# Supplementary figures and images for: Discovery of 1,3-diyne compounds as novel and potent antidepressant agents: synthesis, cell-based assay and behavioral studies
Source: Royal Society of Chemistry journal article supplement (doi:10.1039/c7ra01268c), 2017-01-01

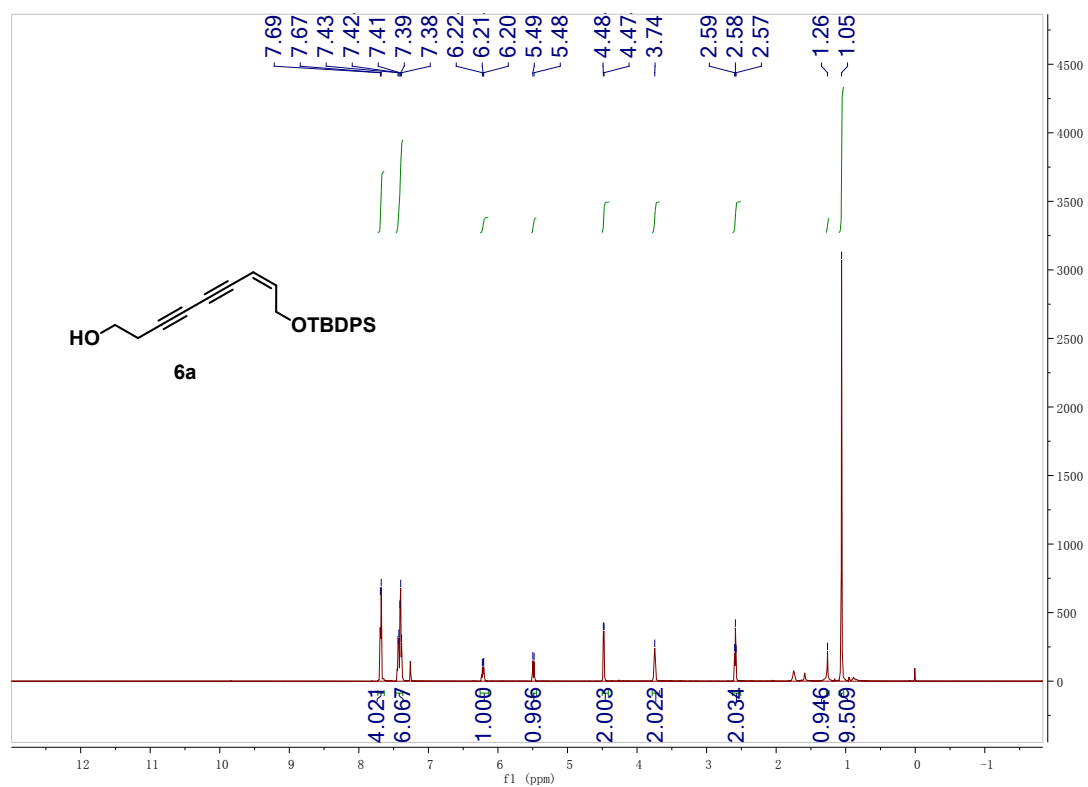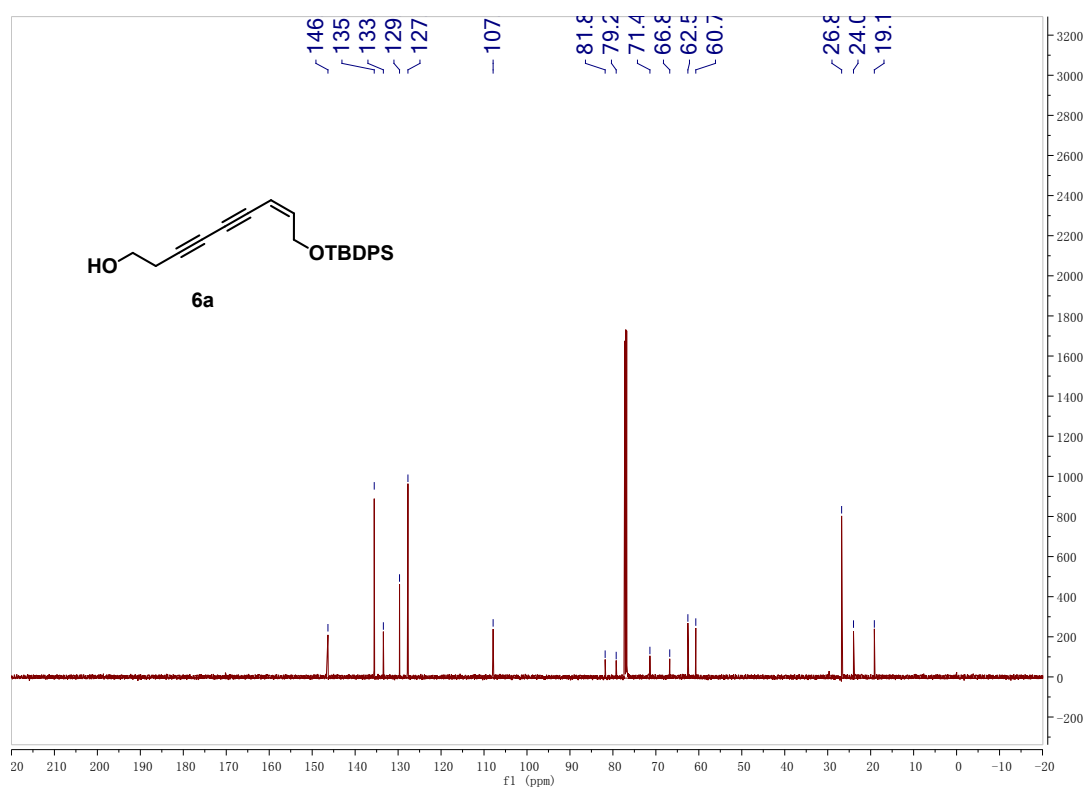

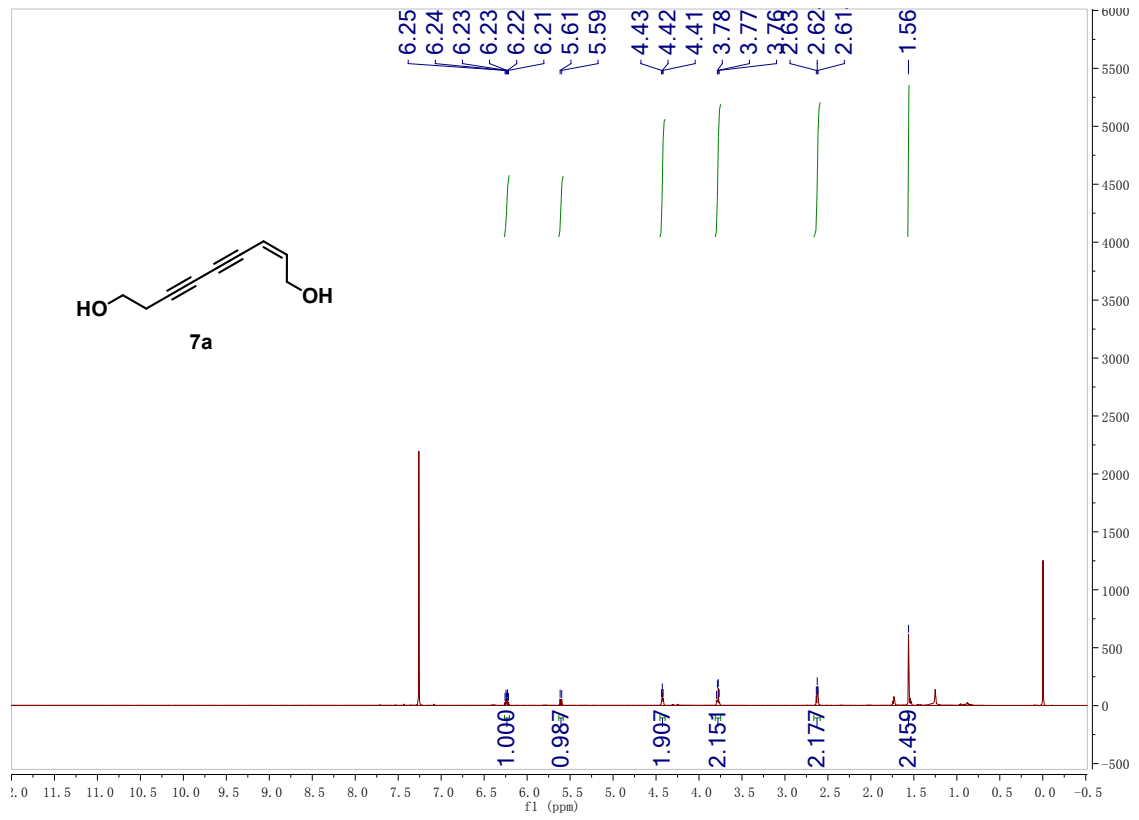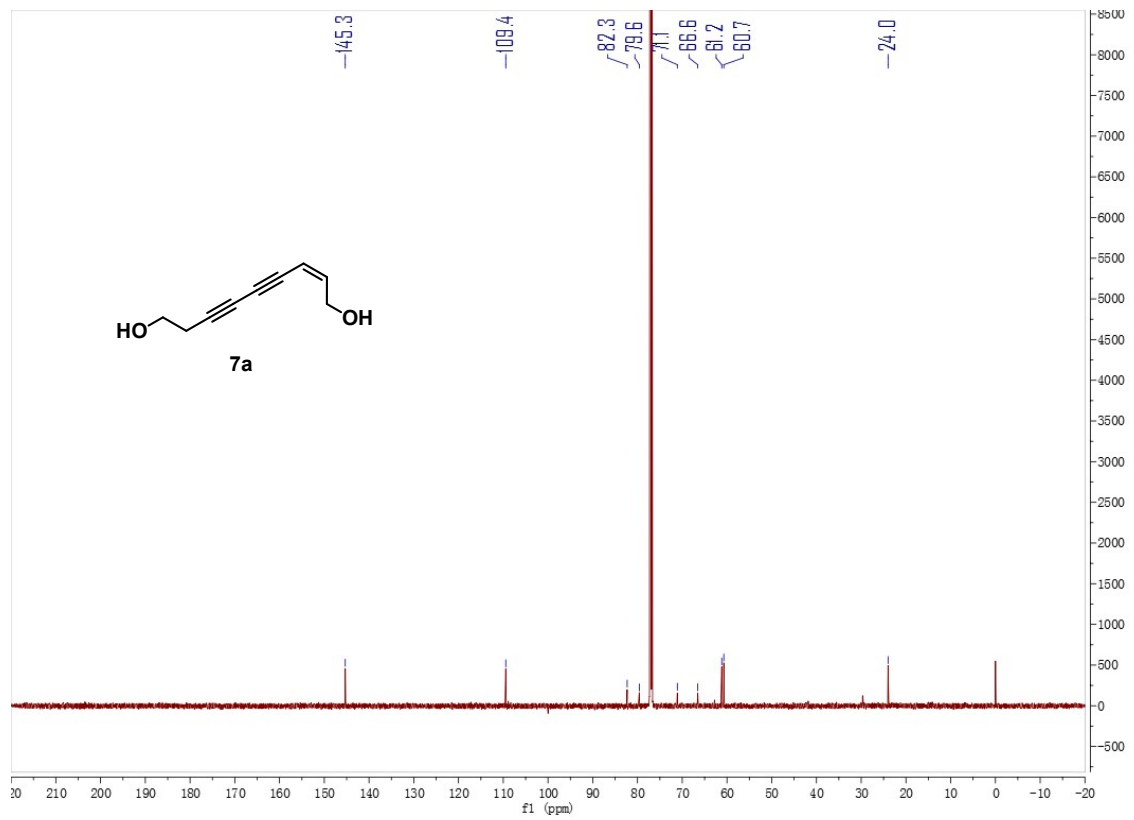

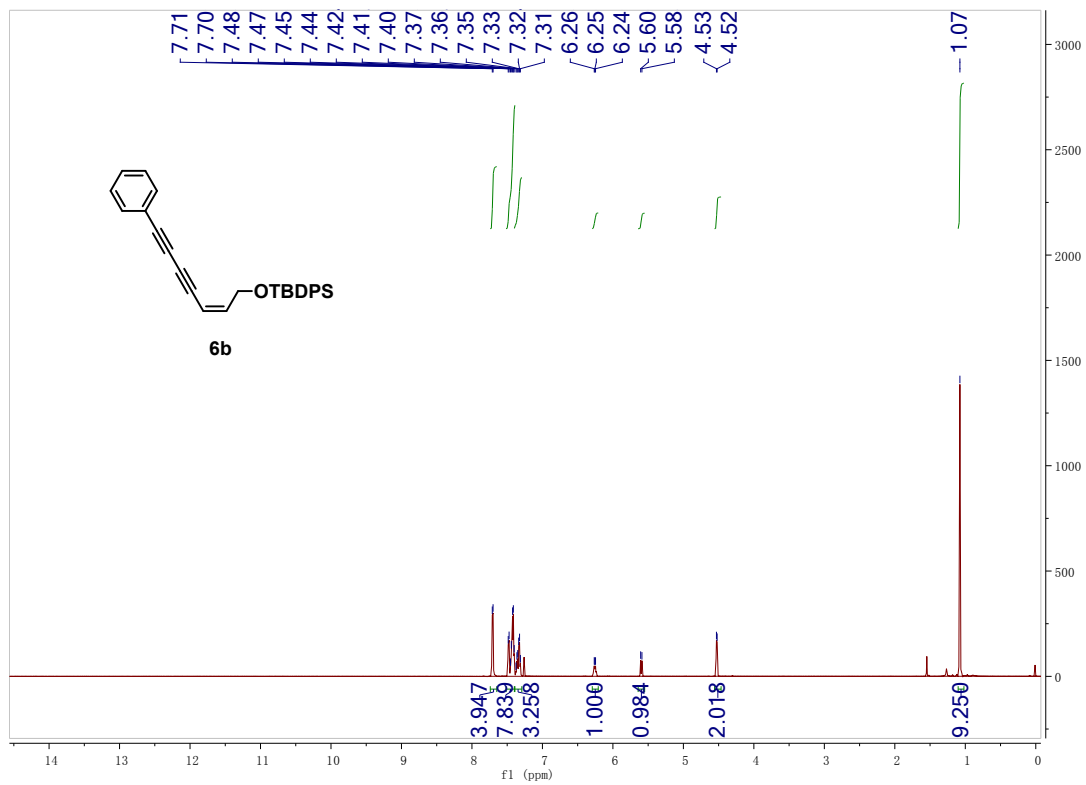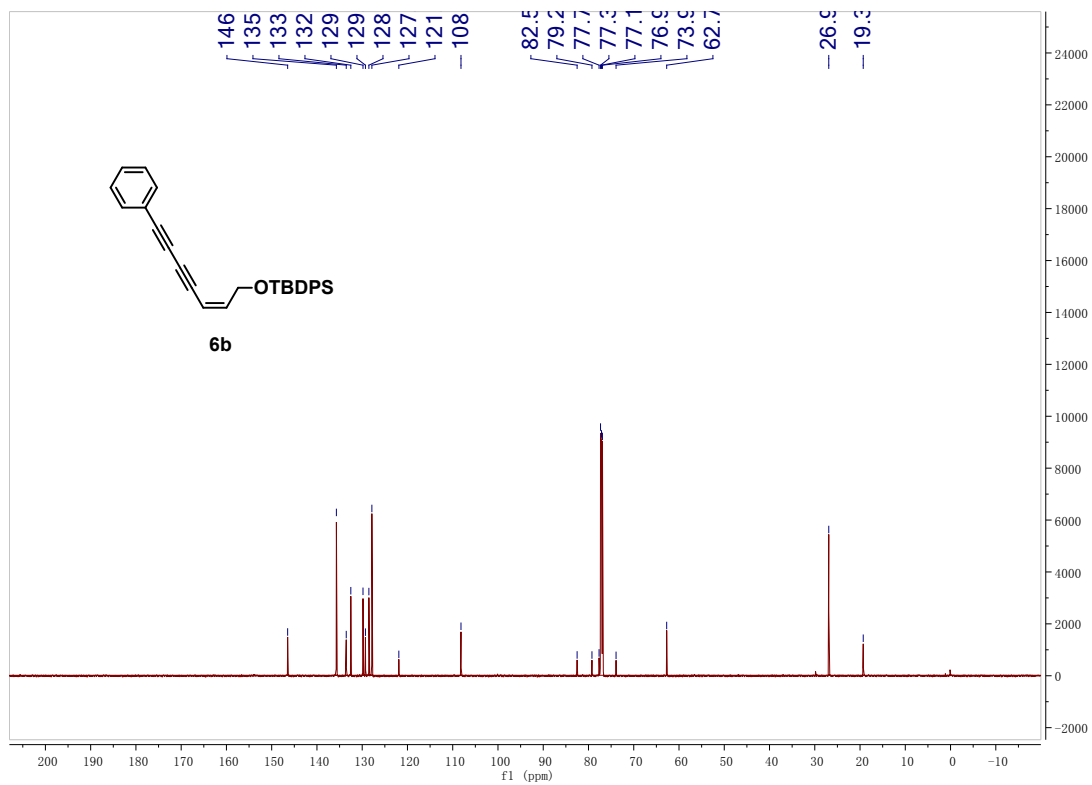

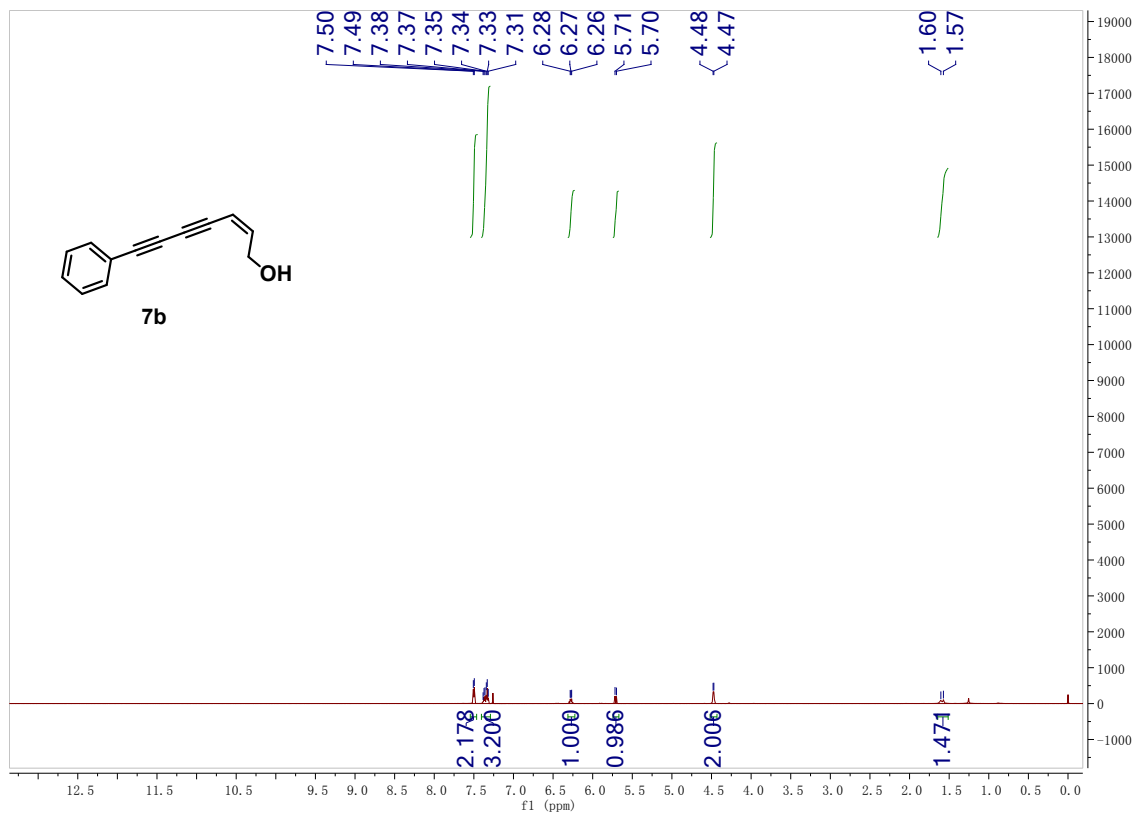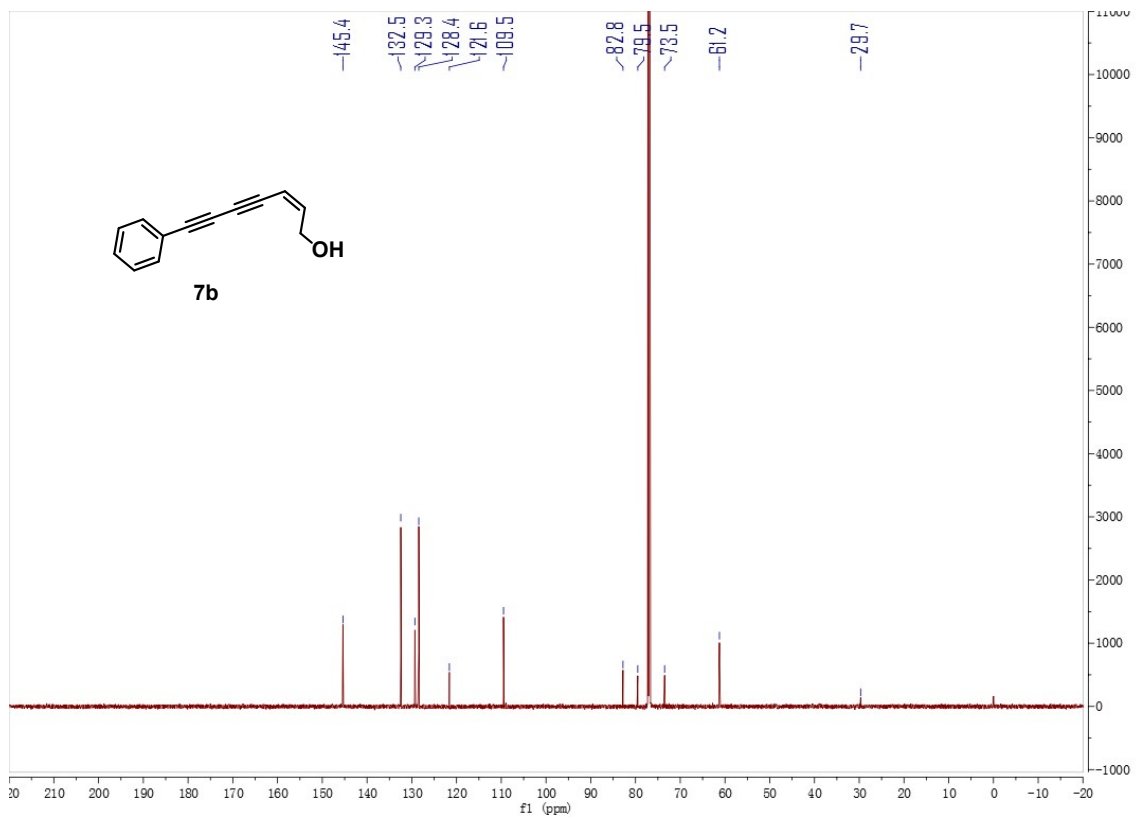

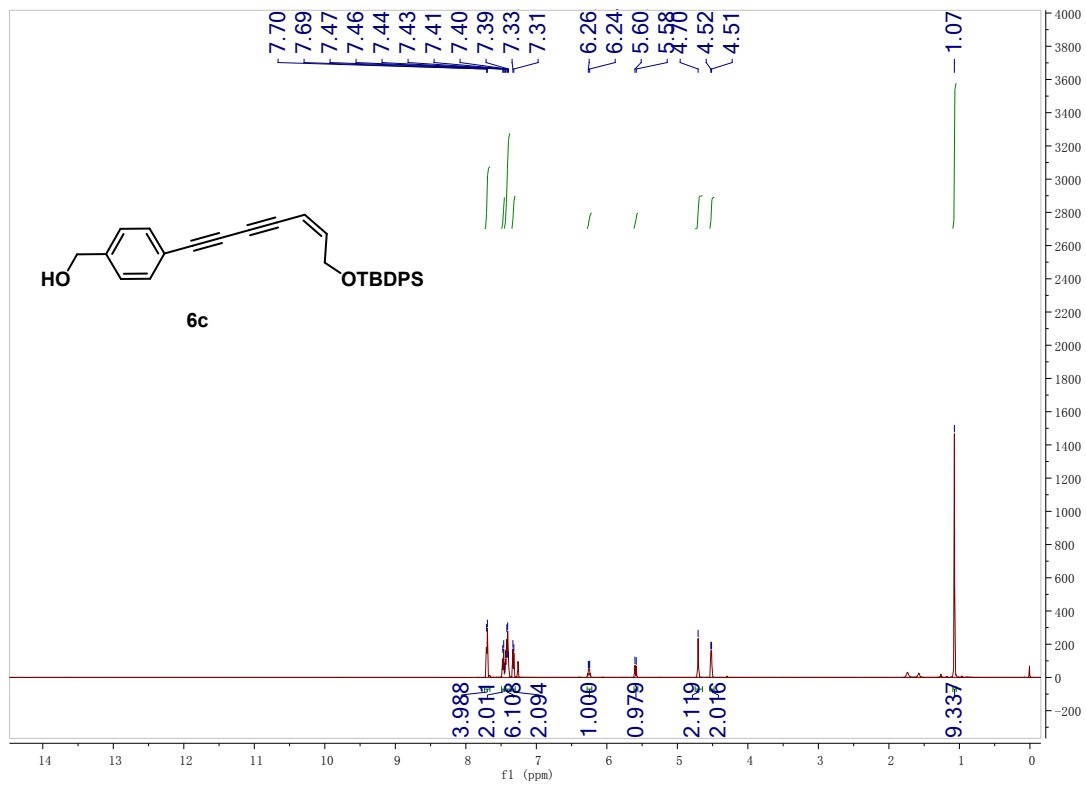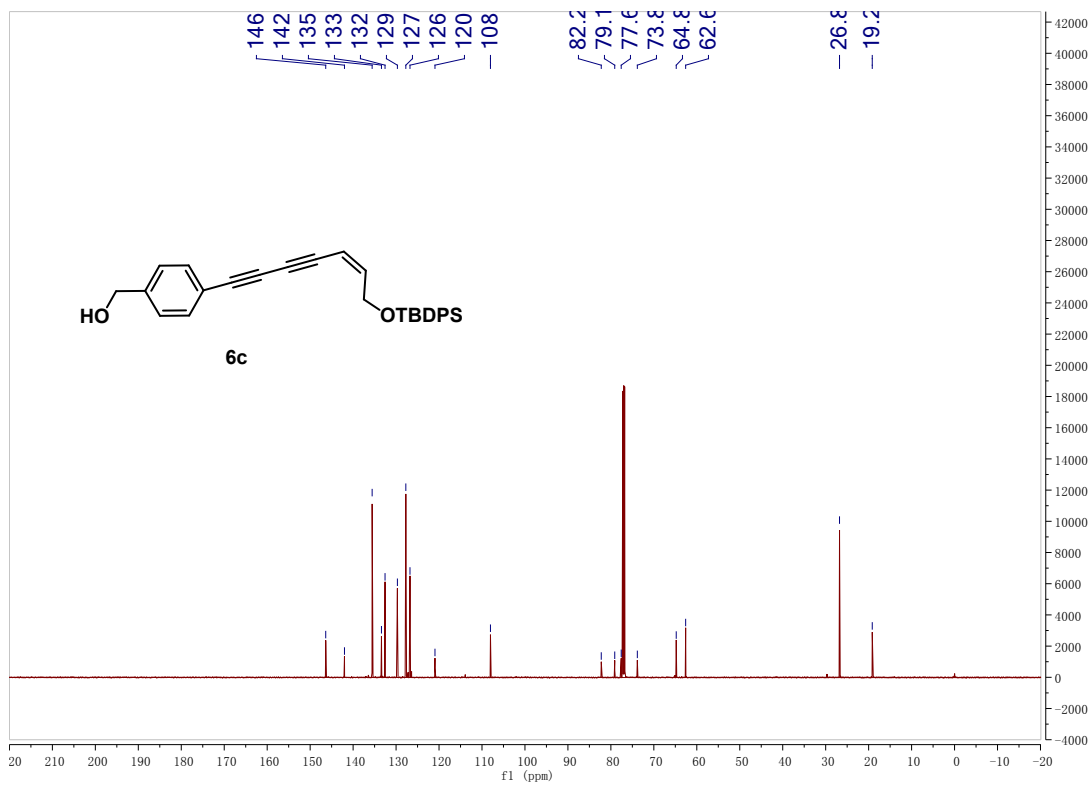

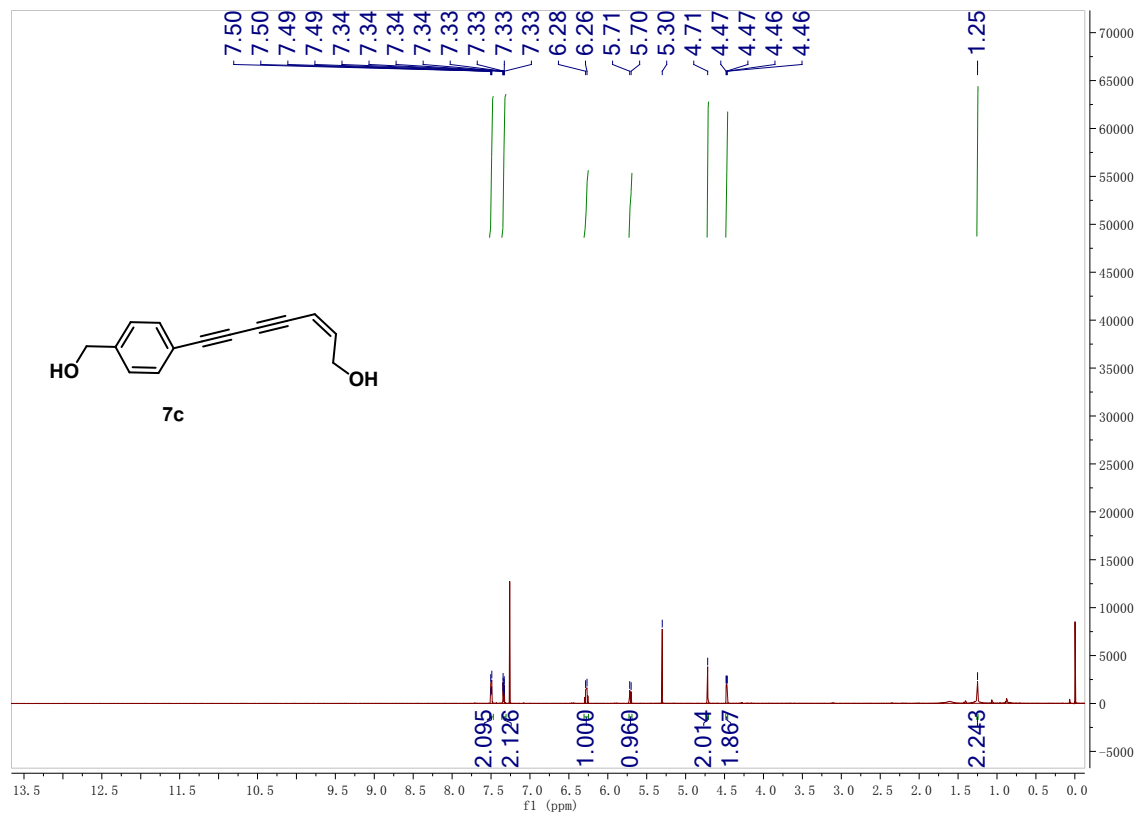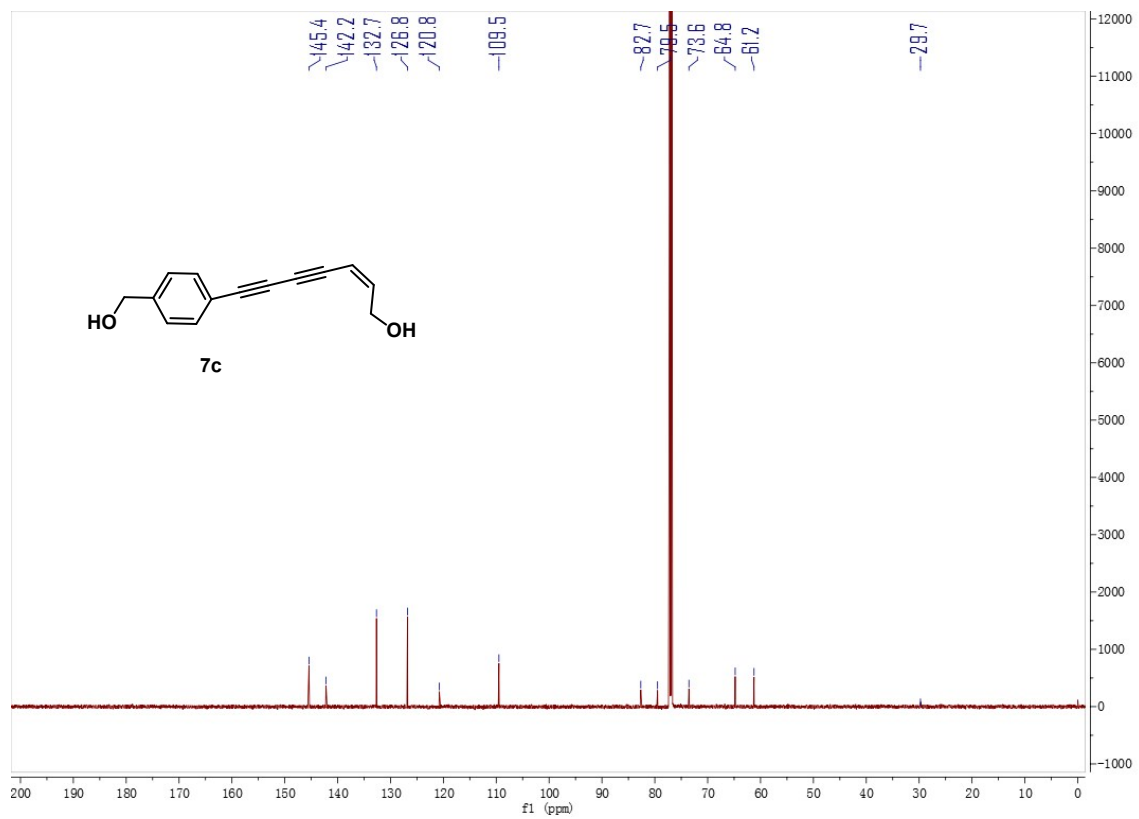

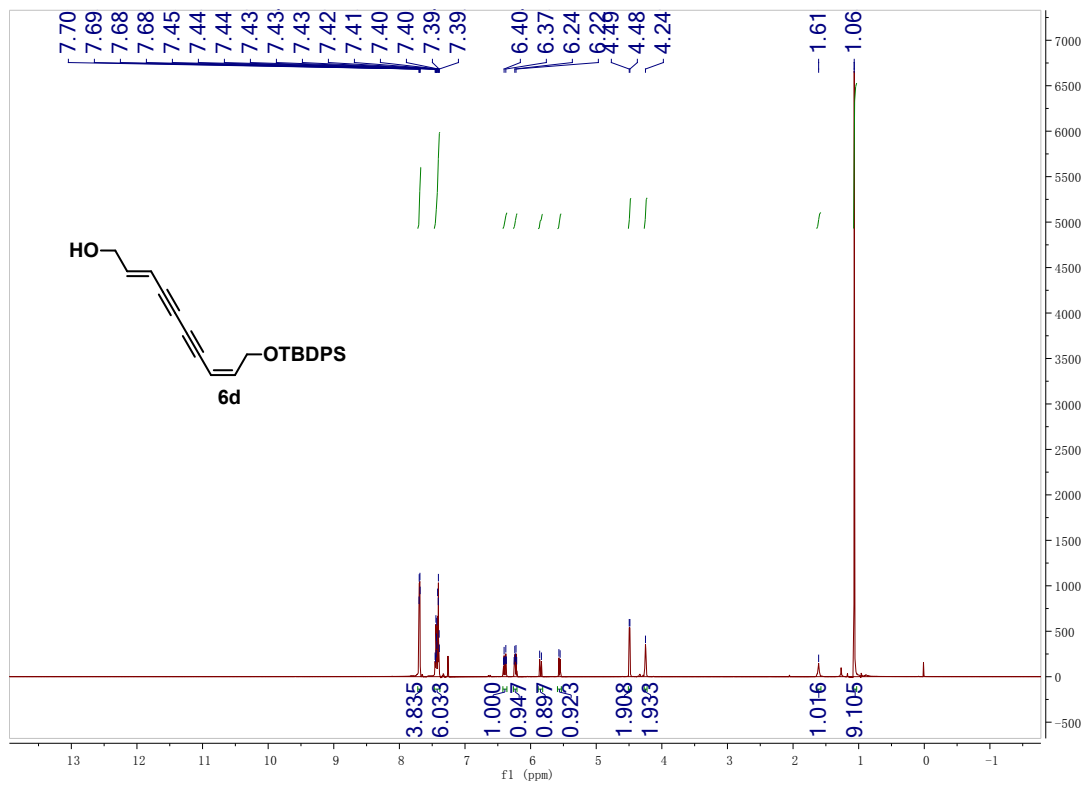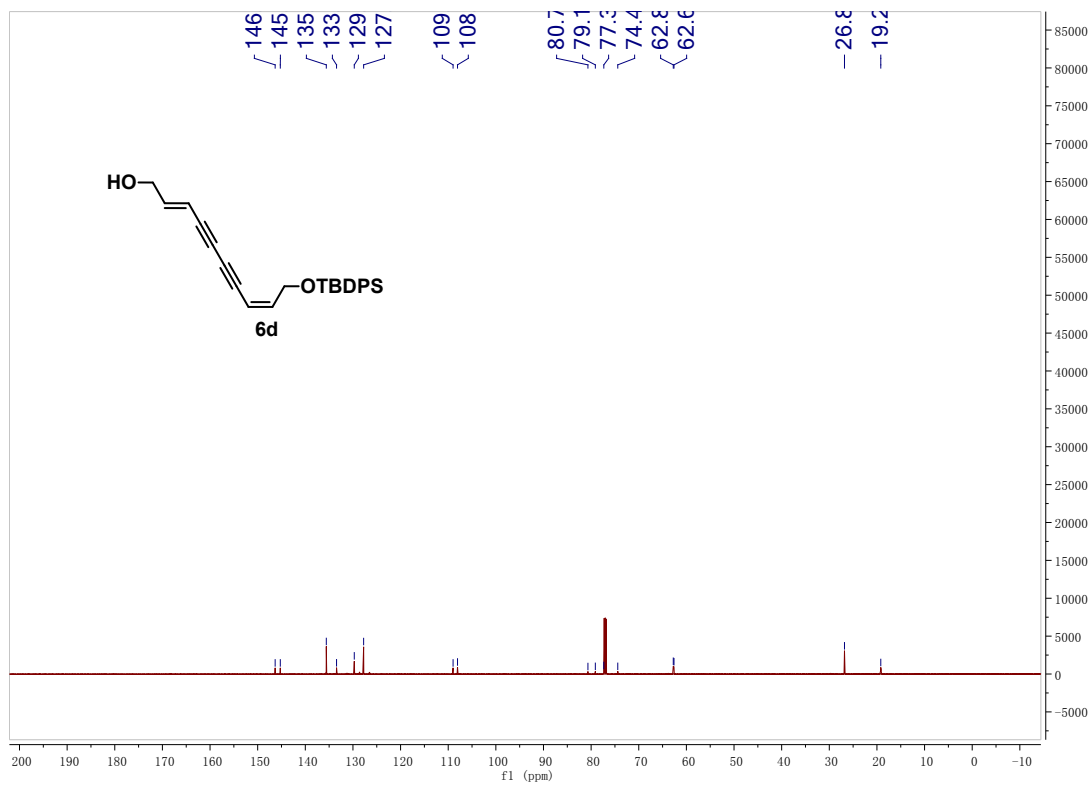

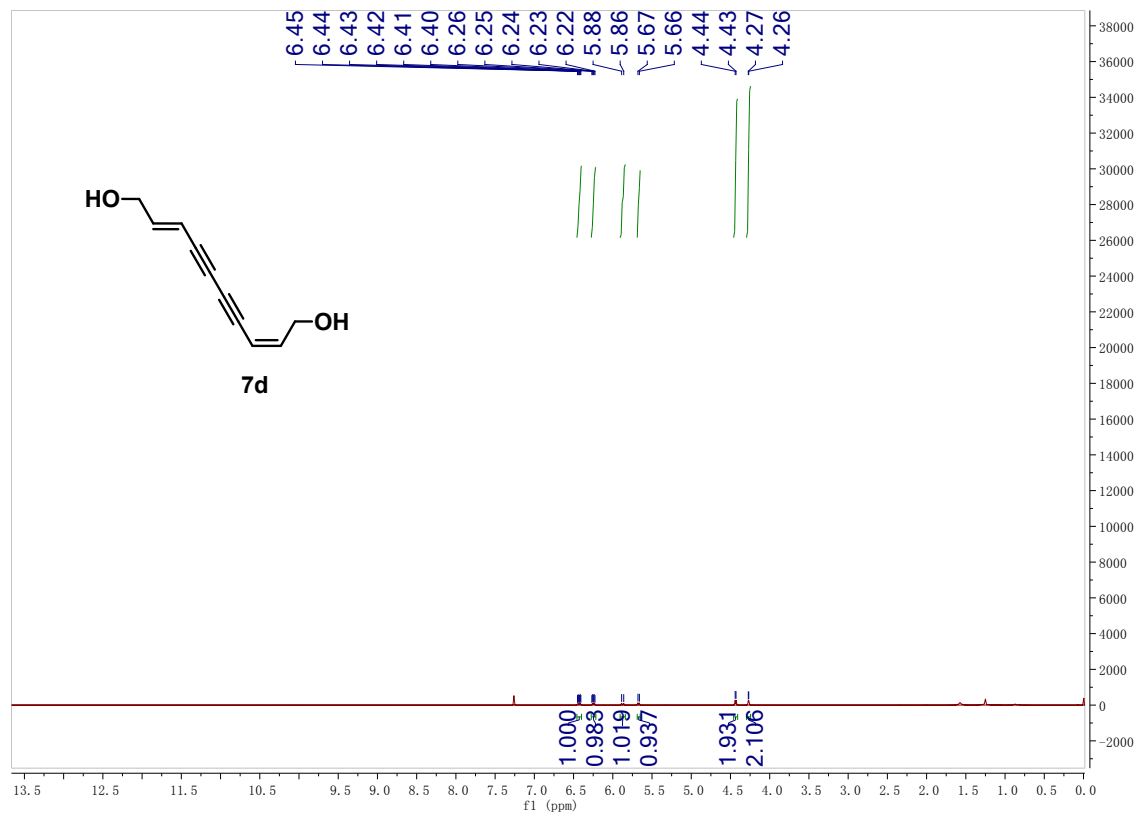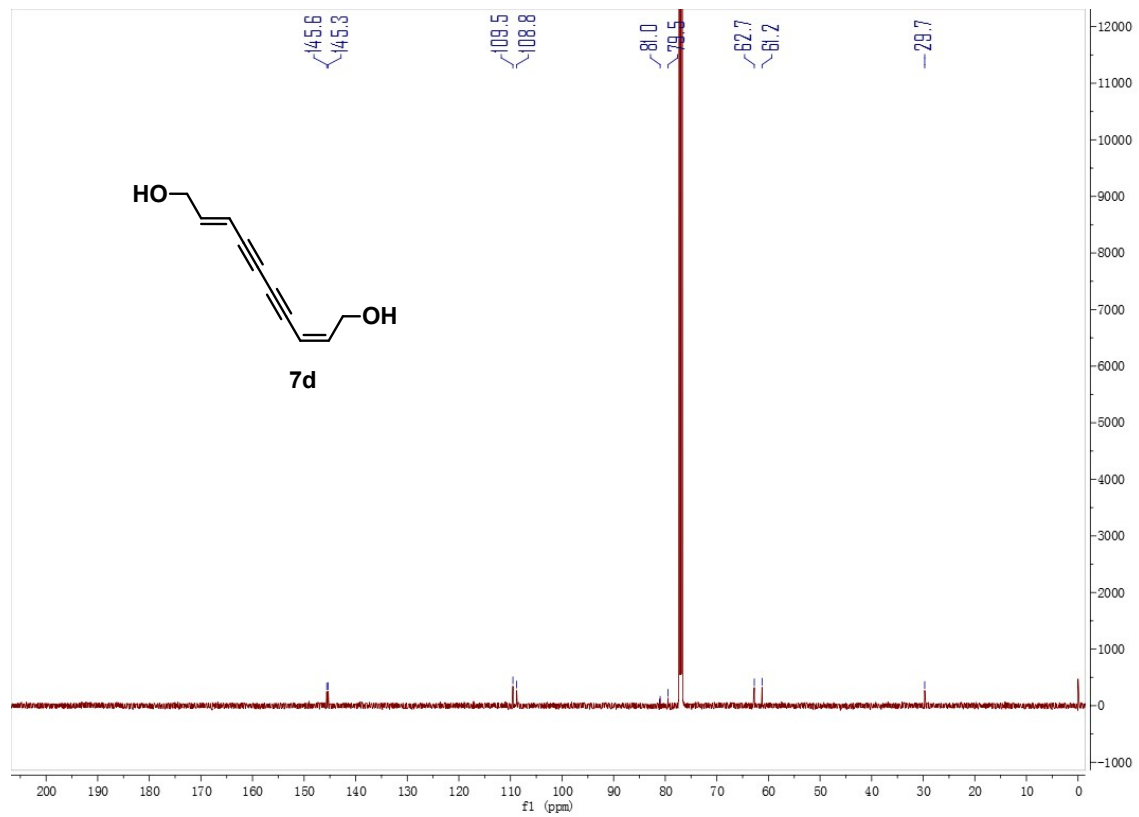



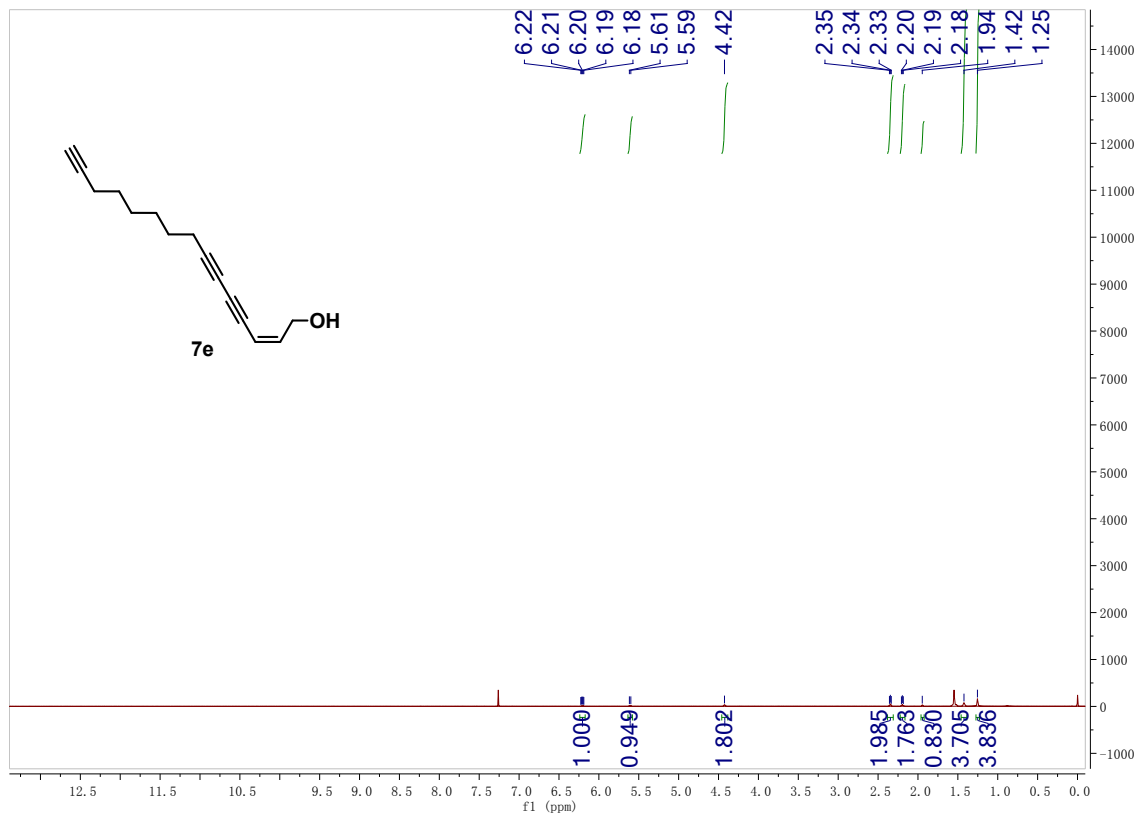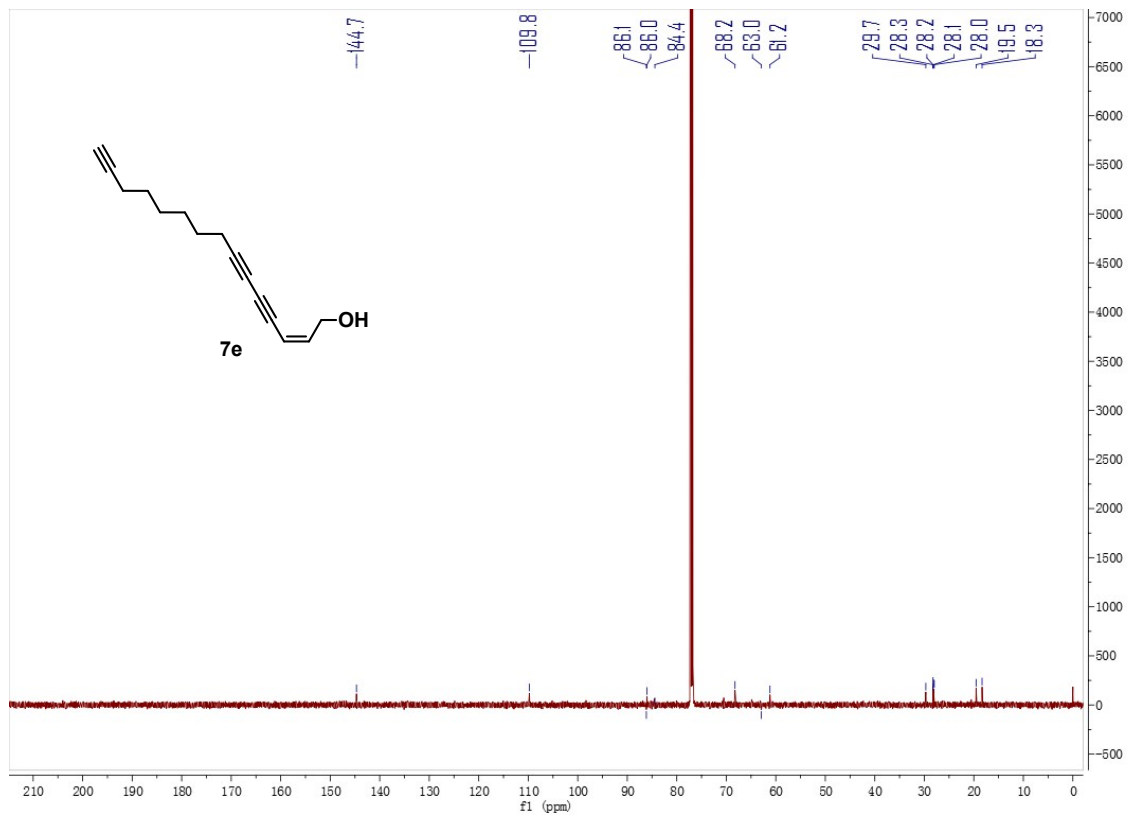

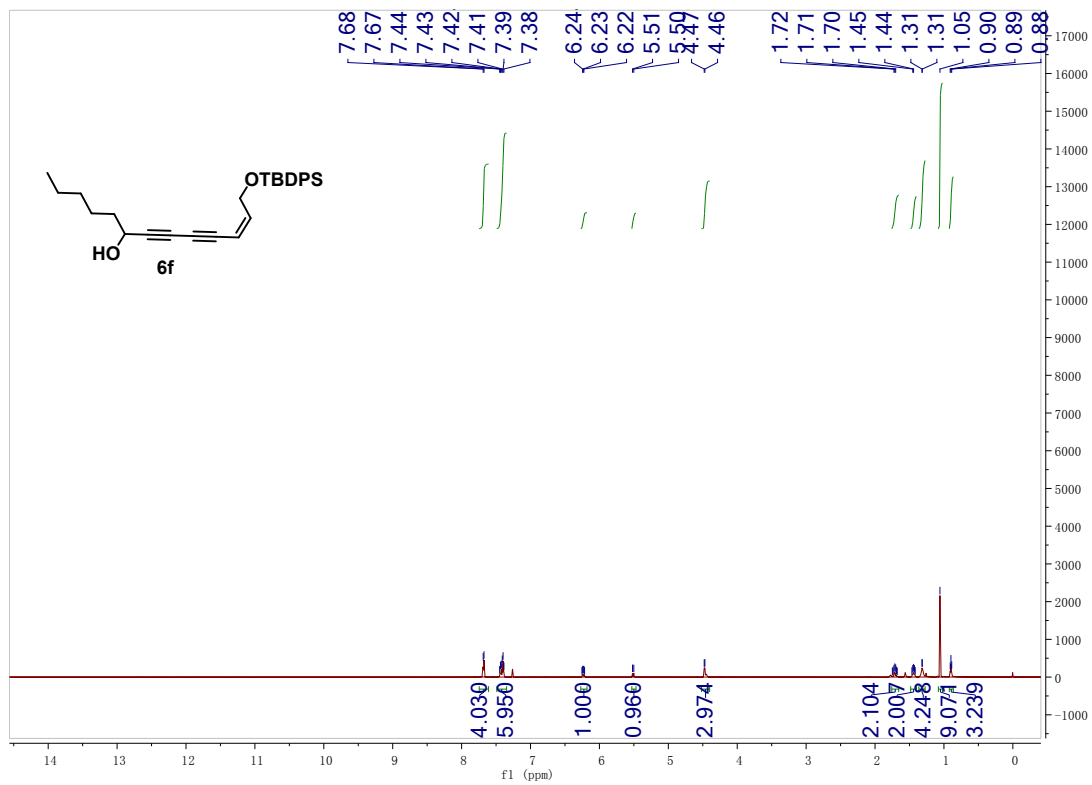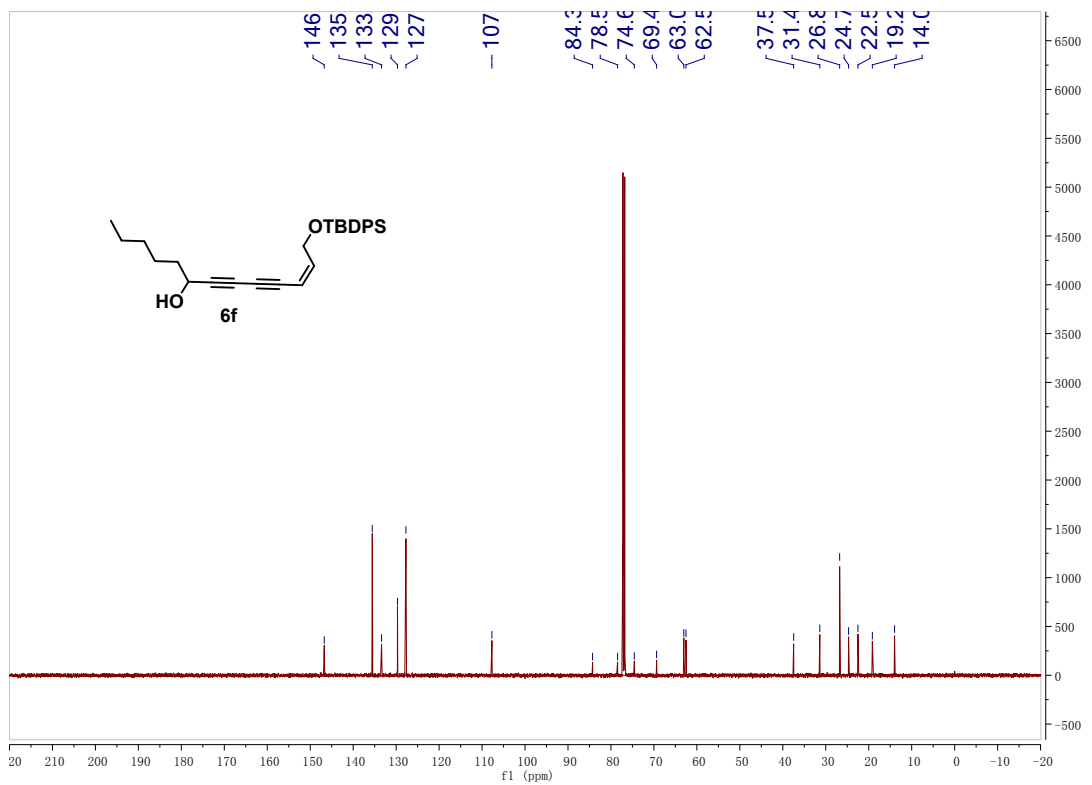

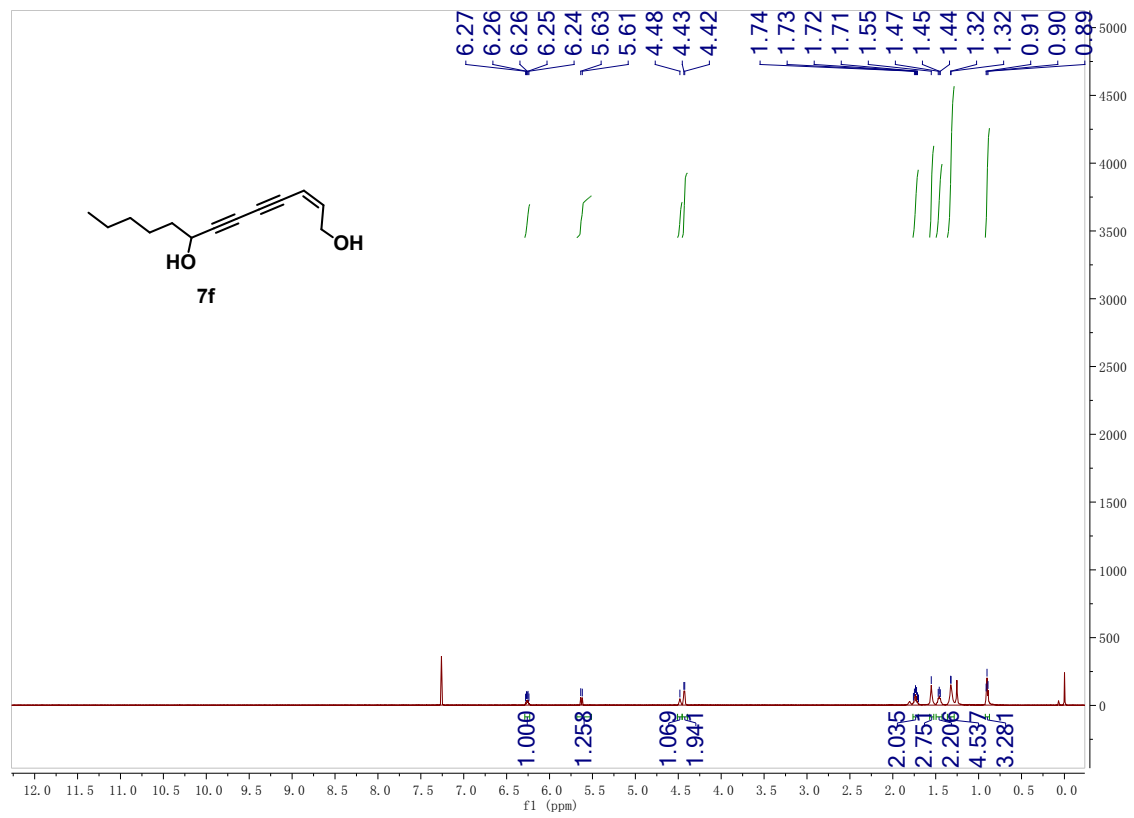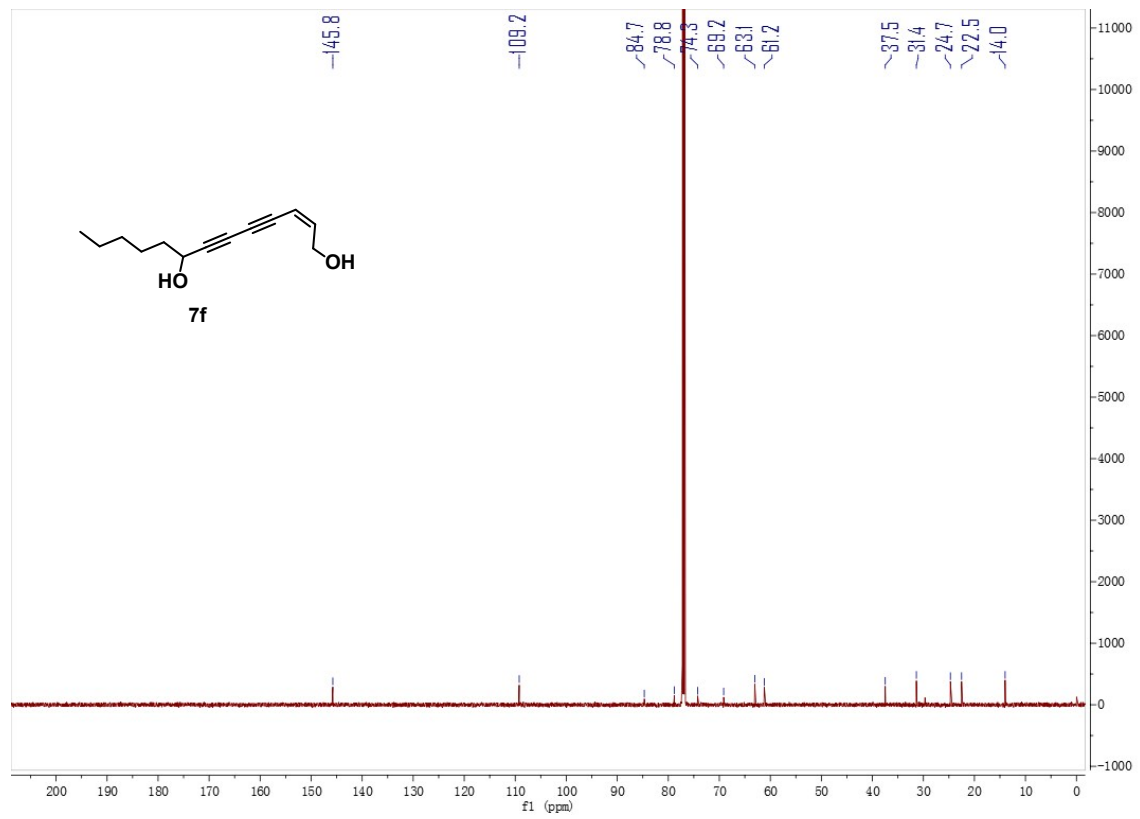

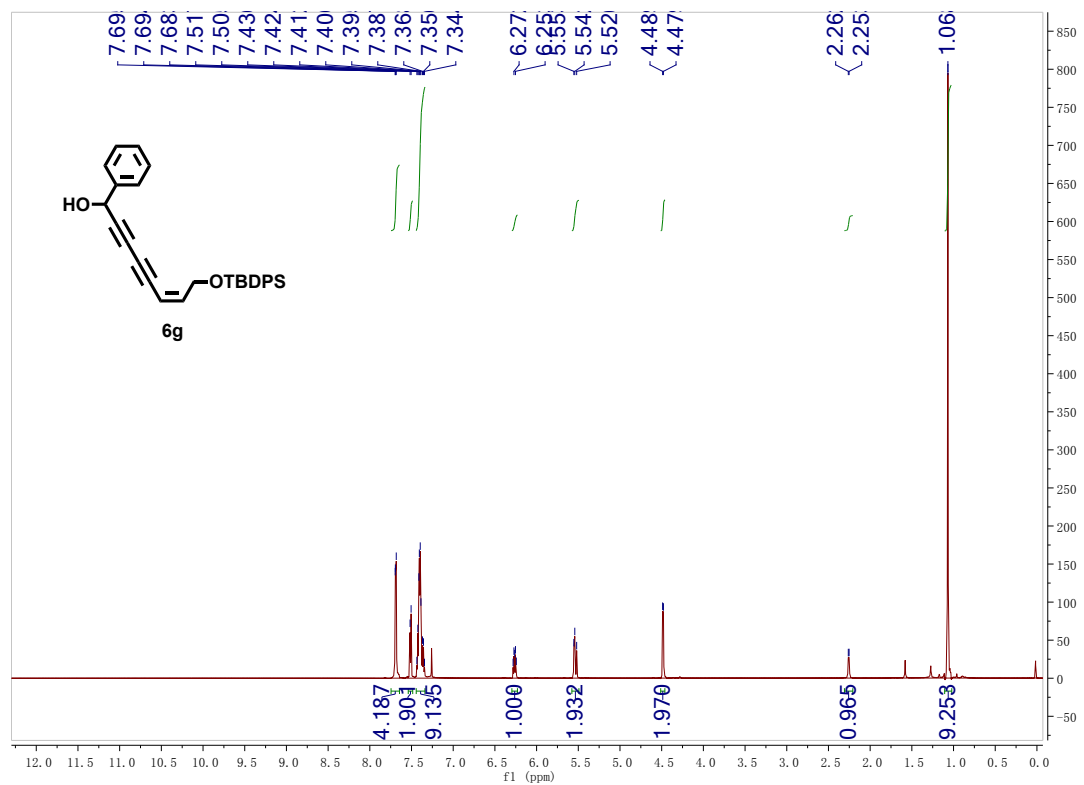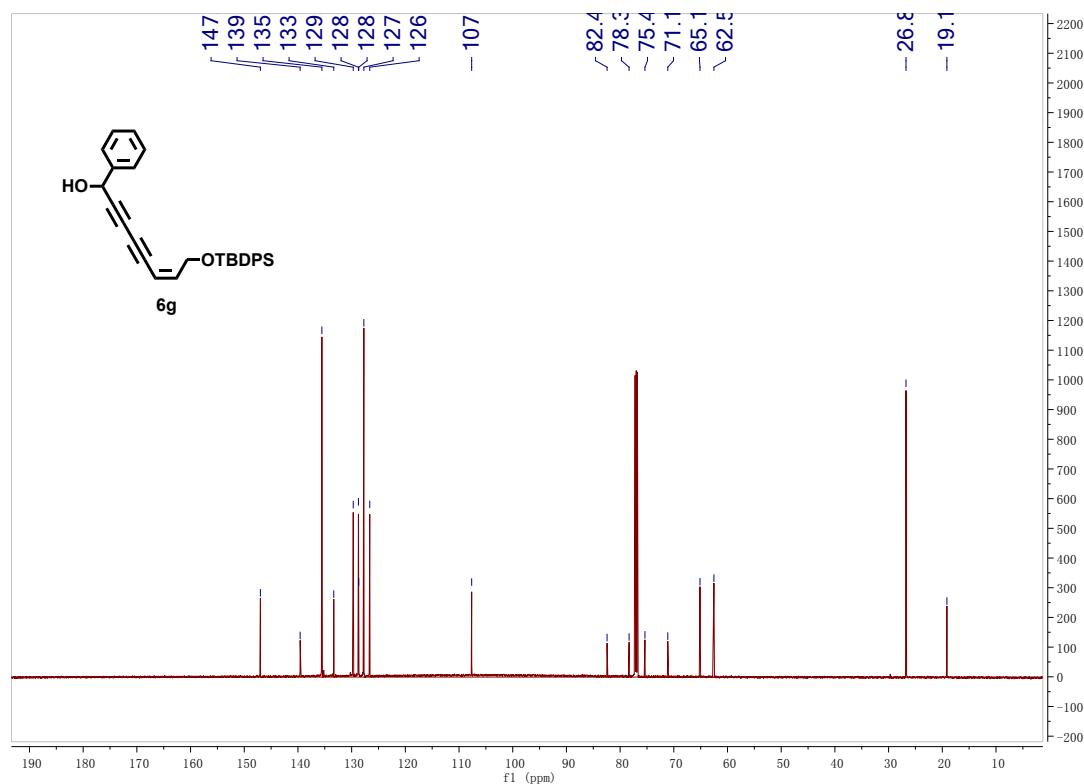

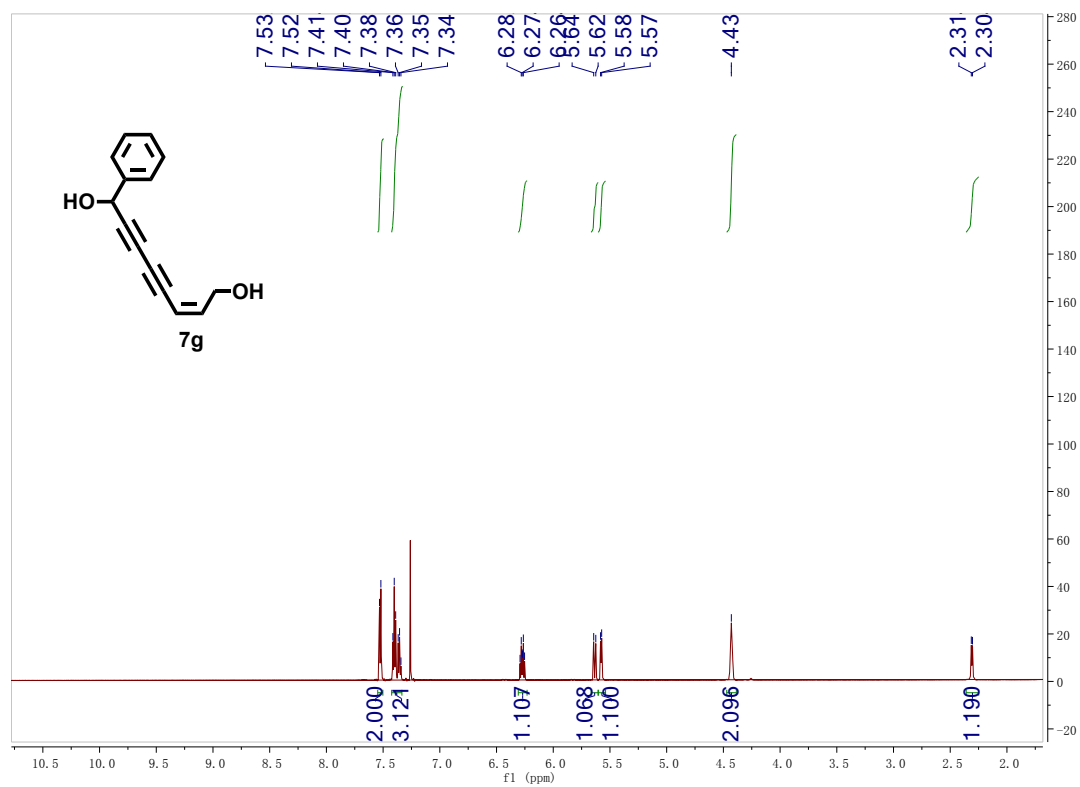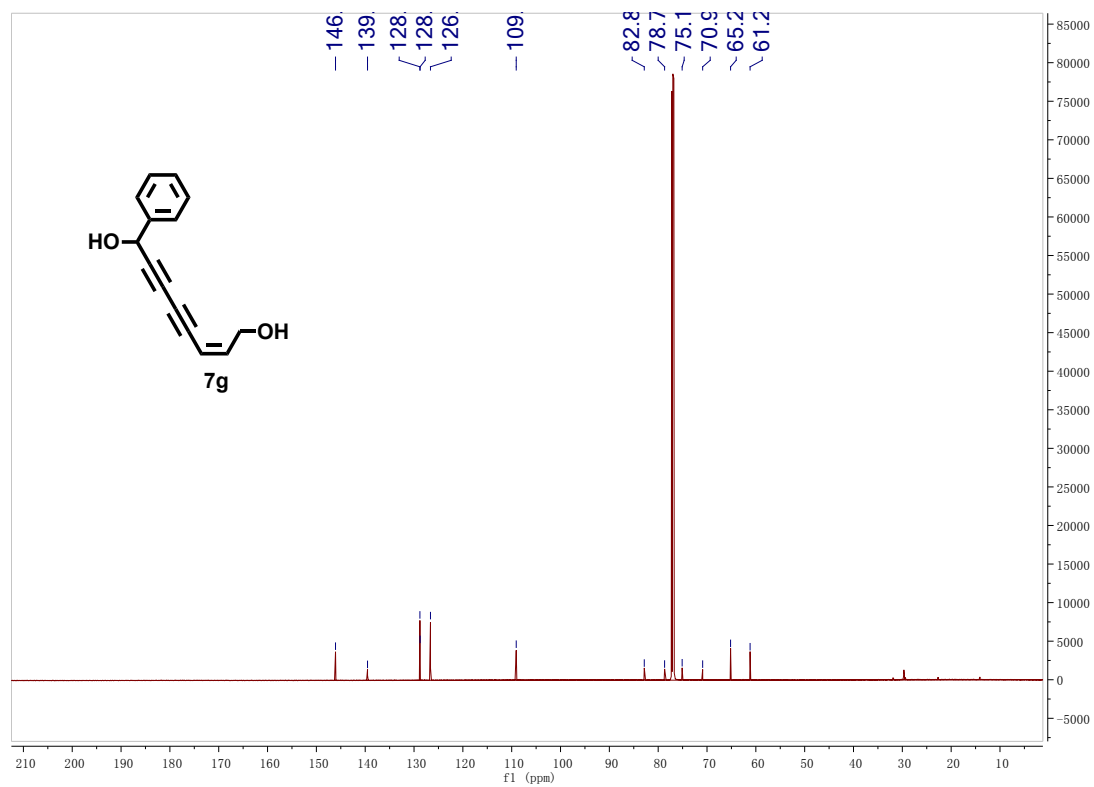

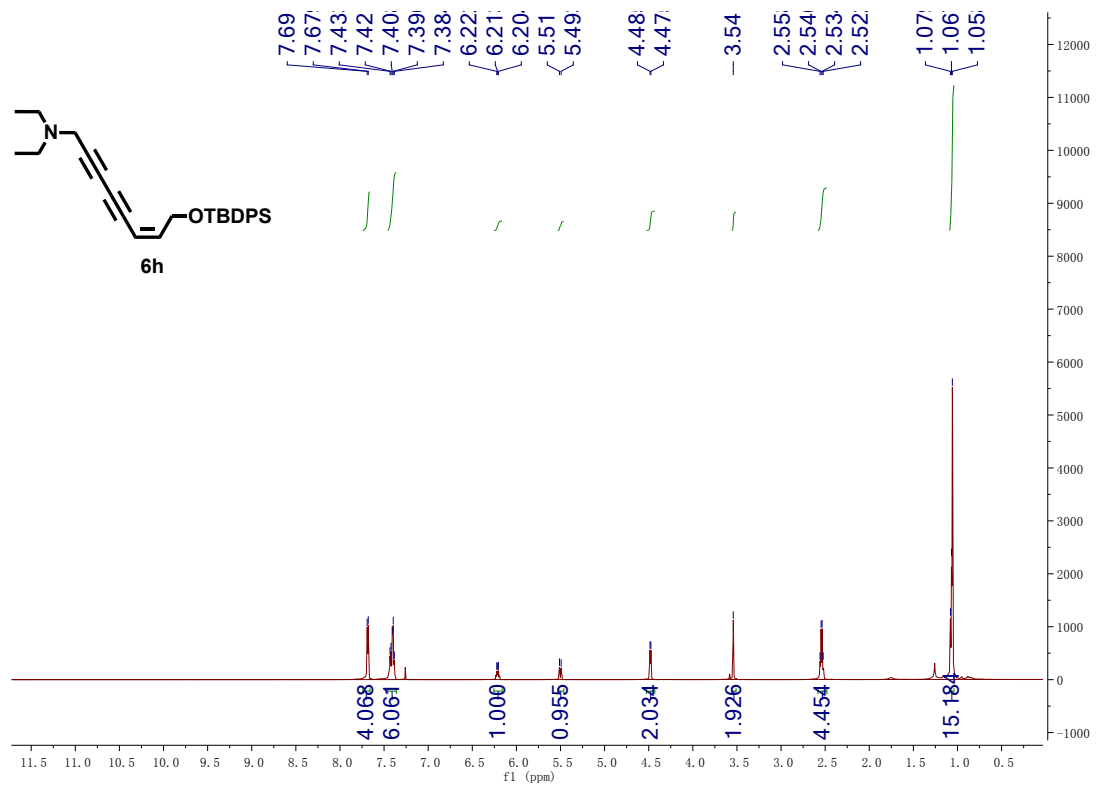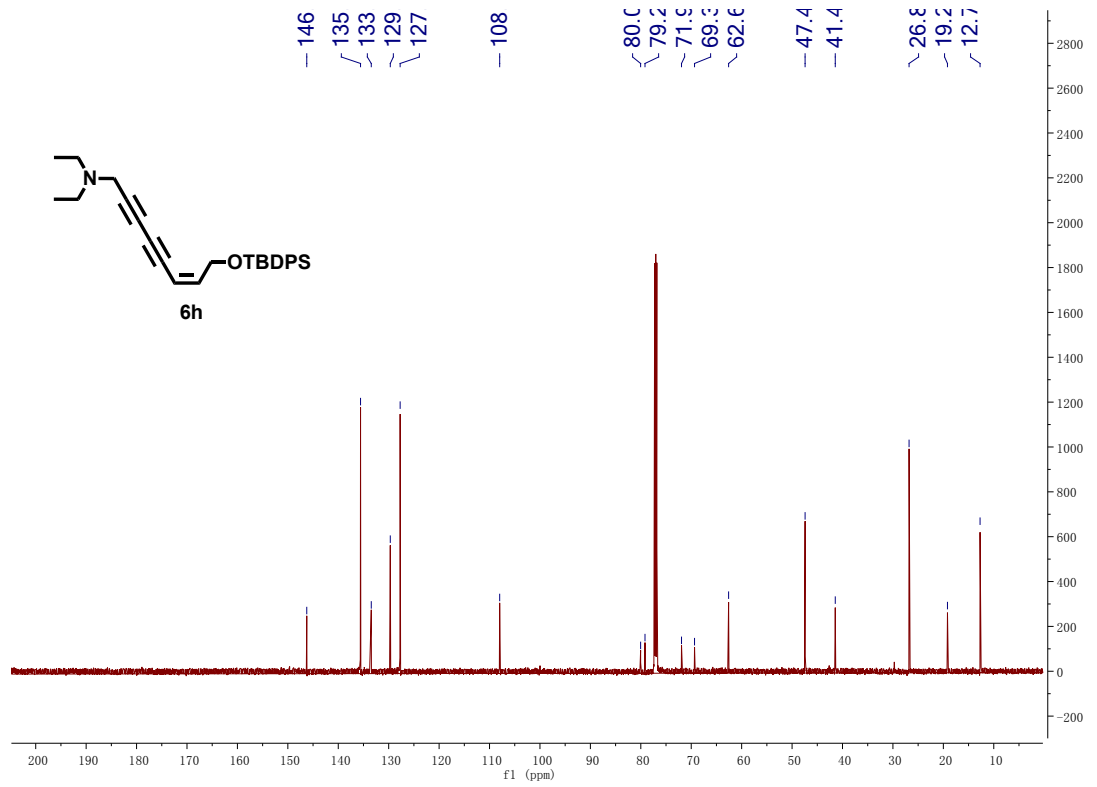

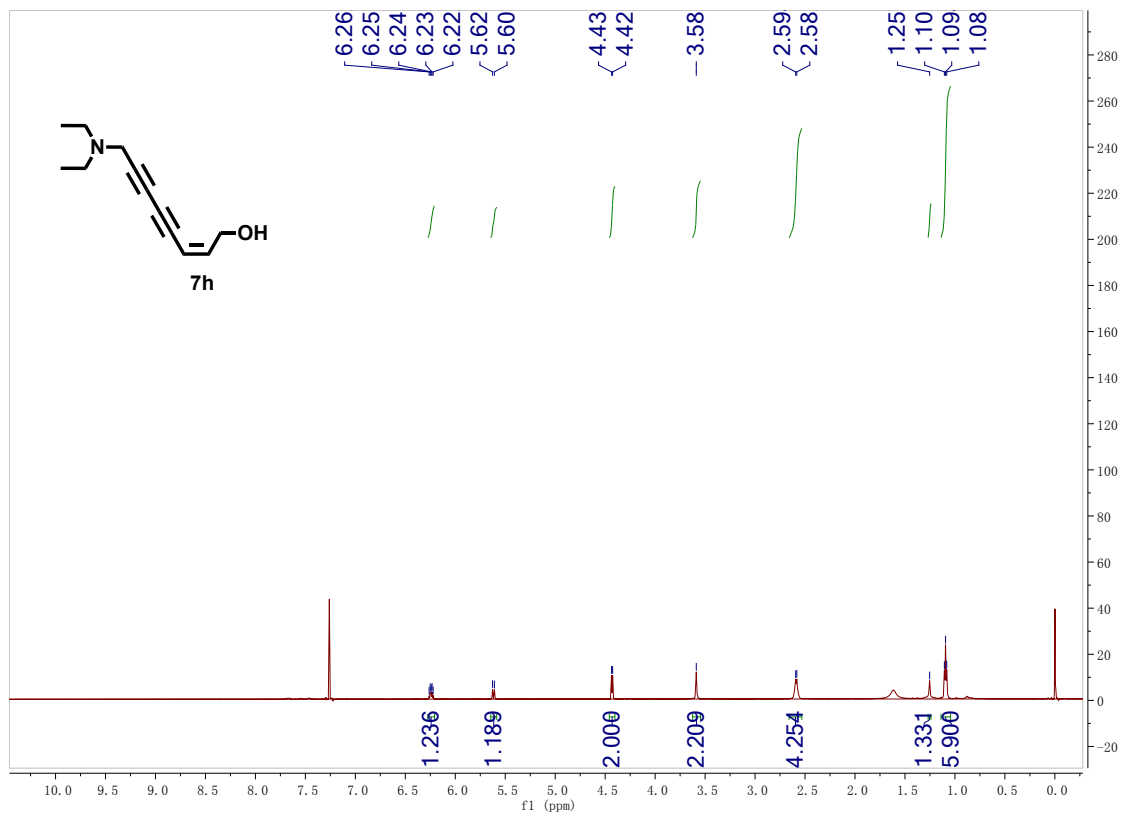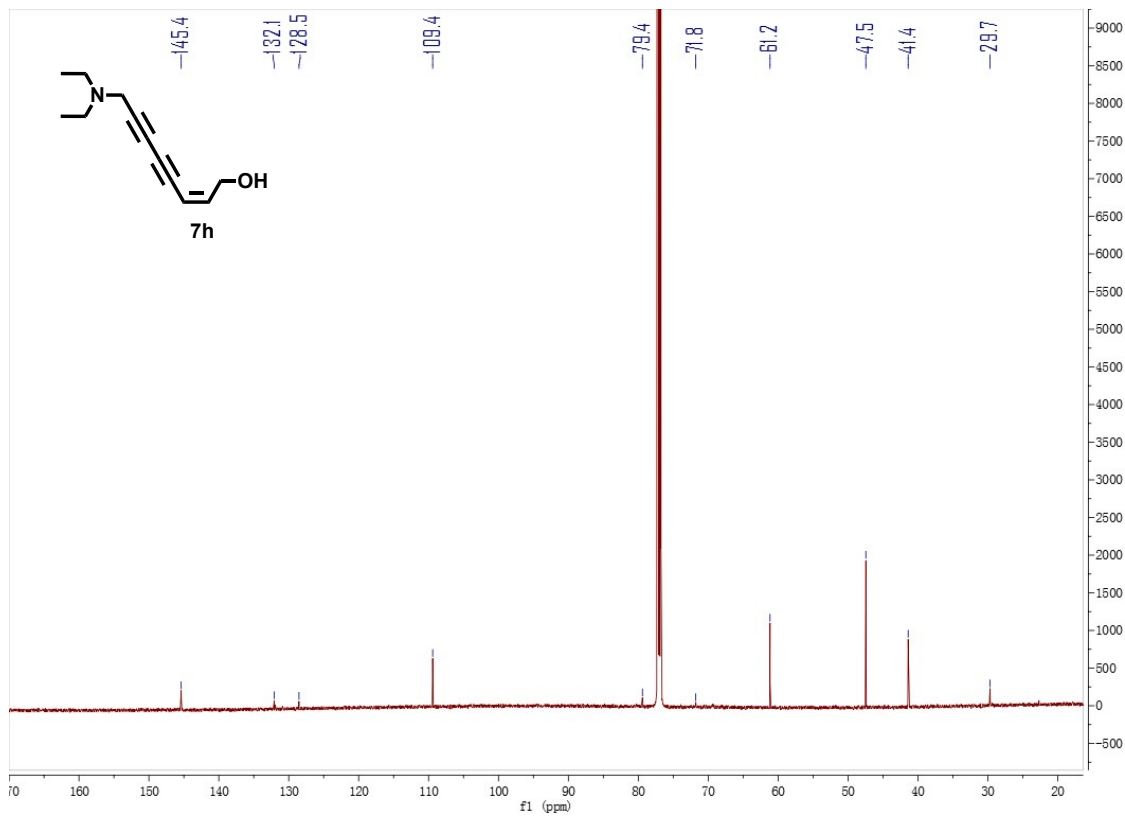

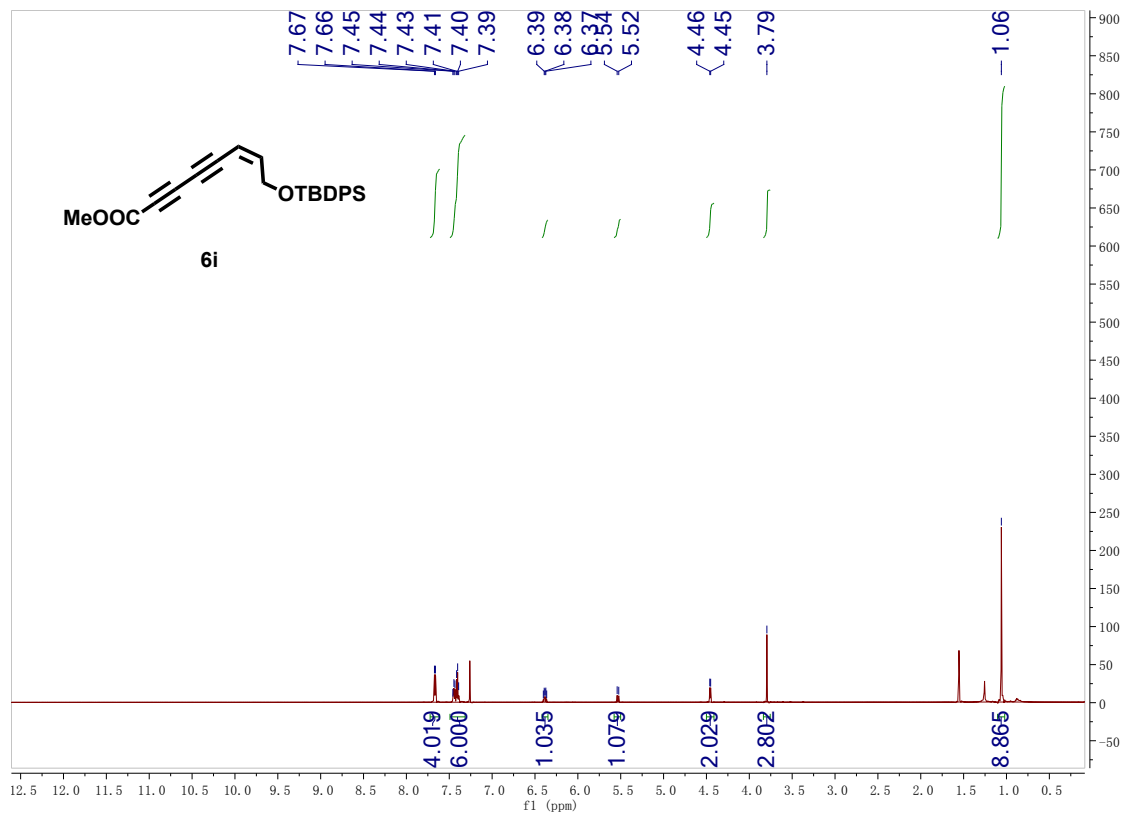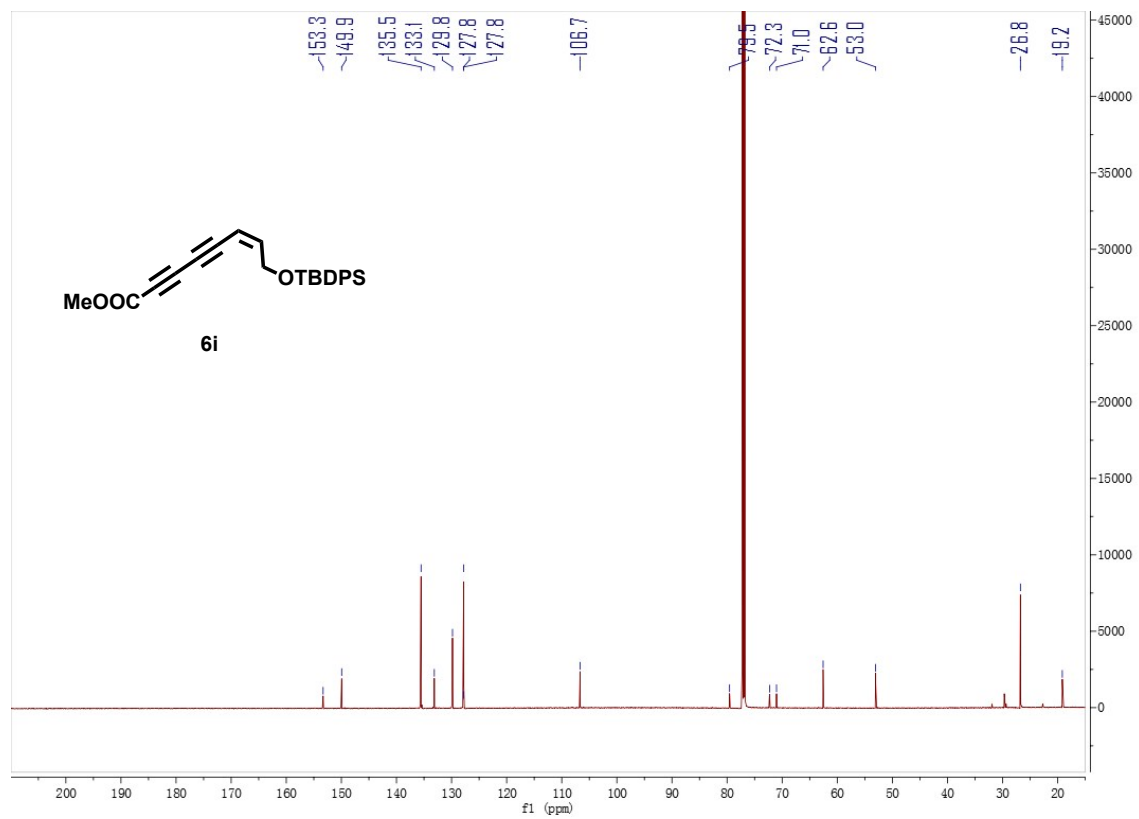



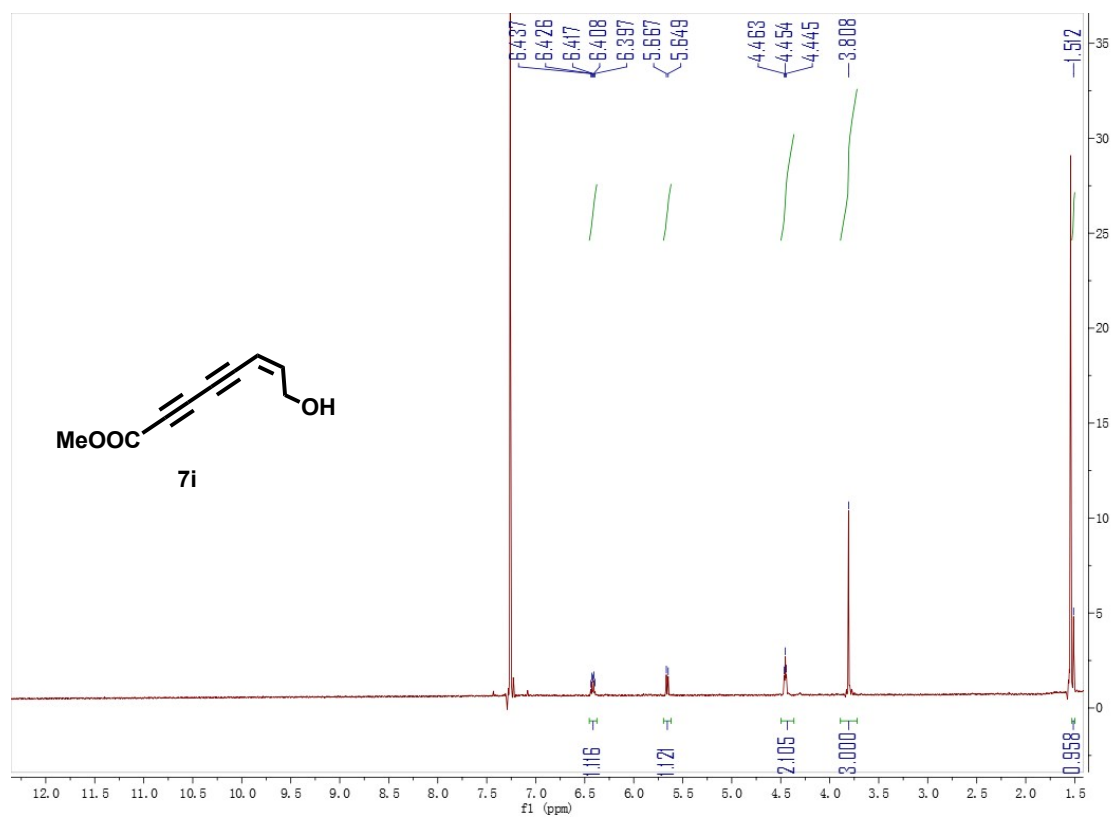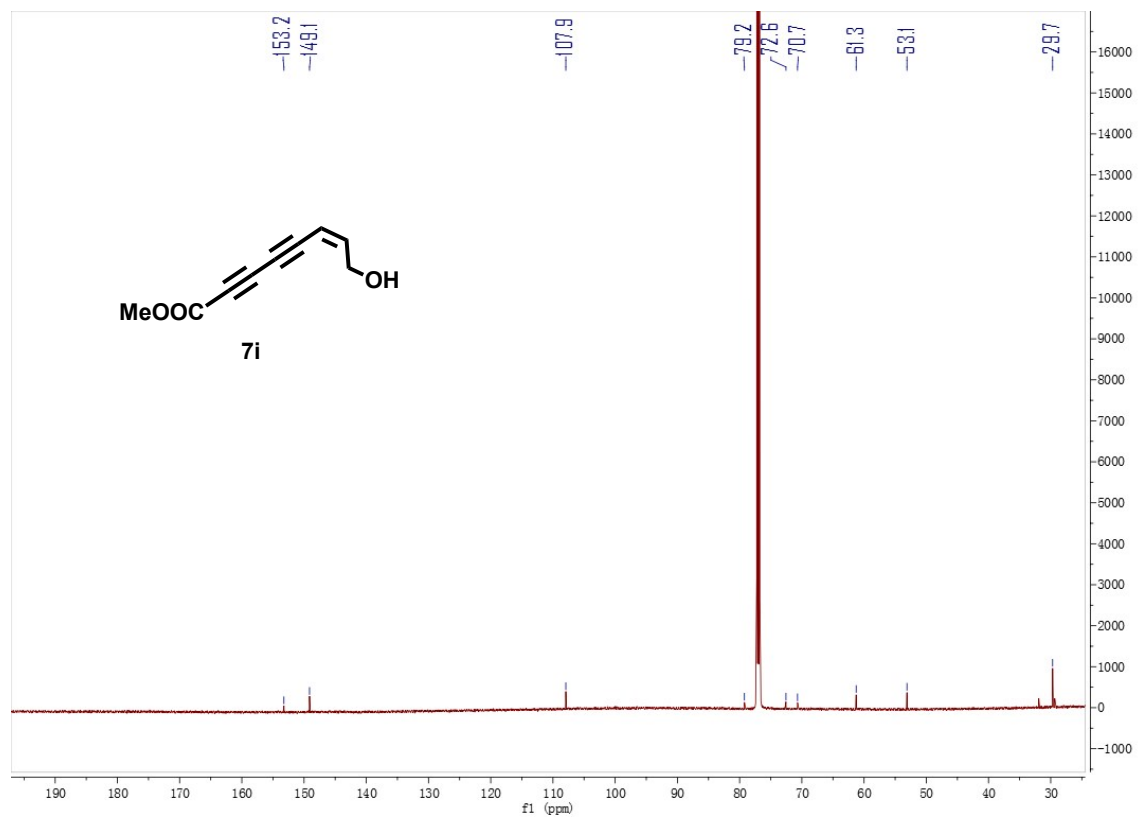

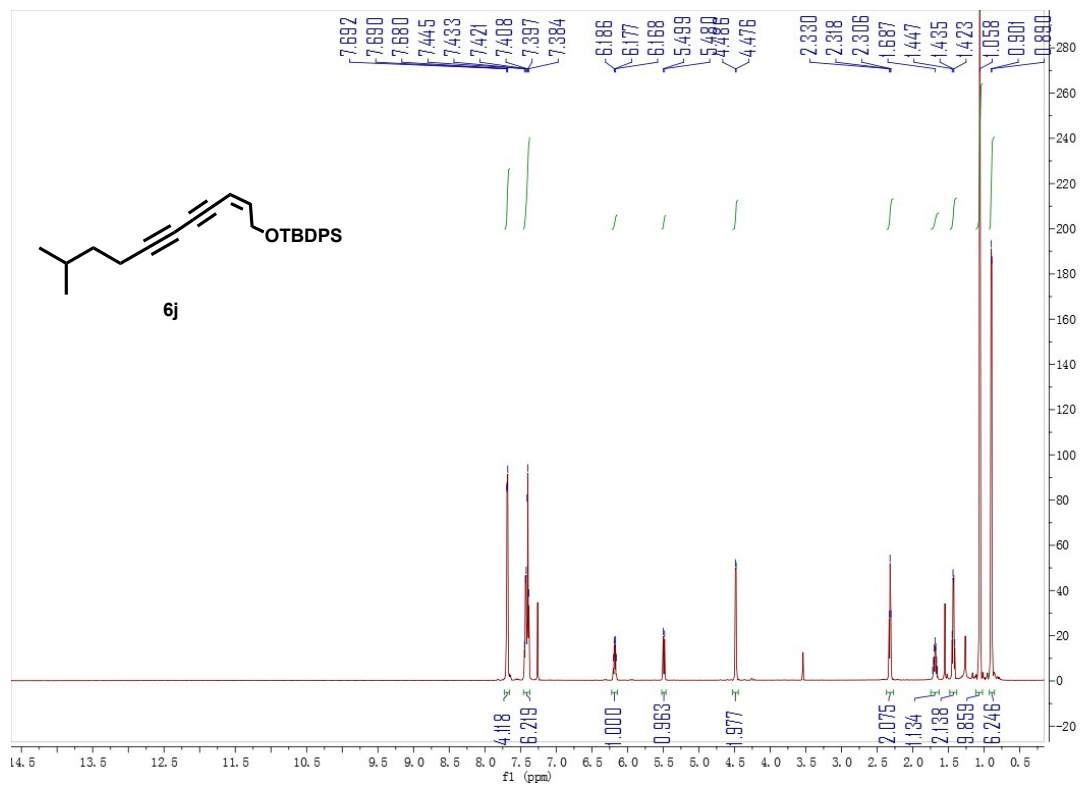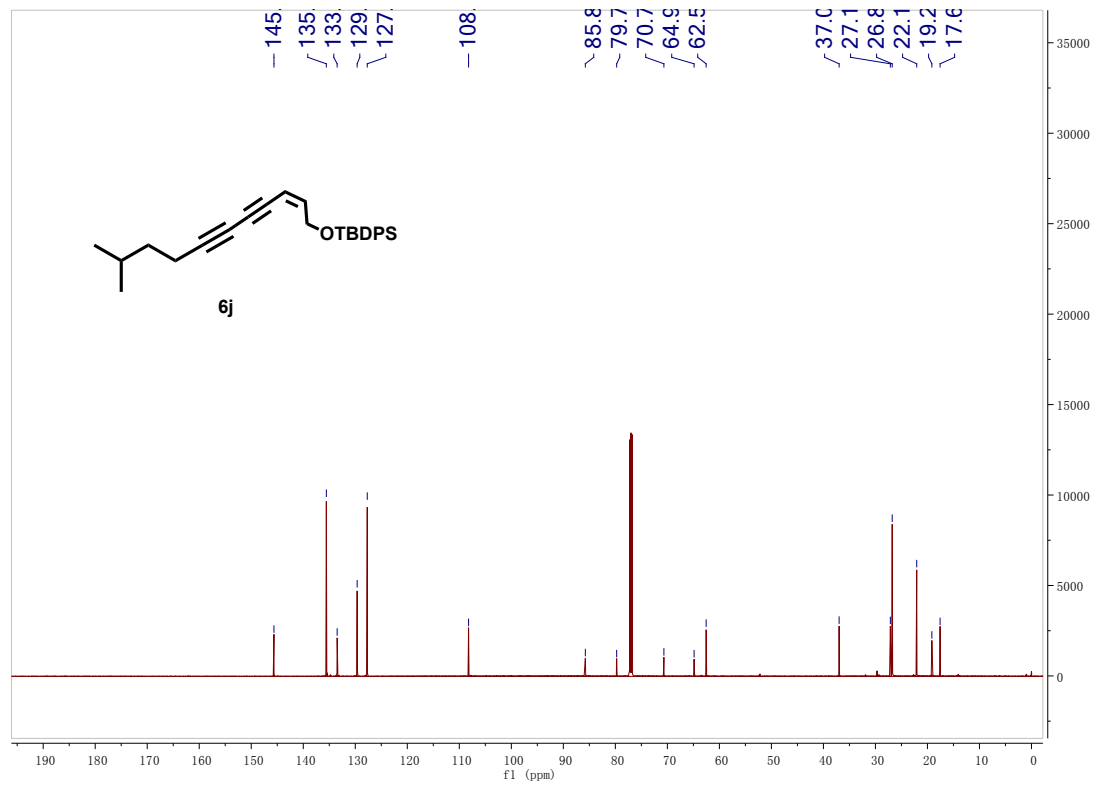

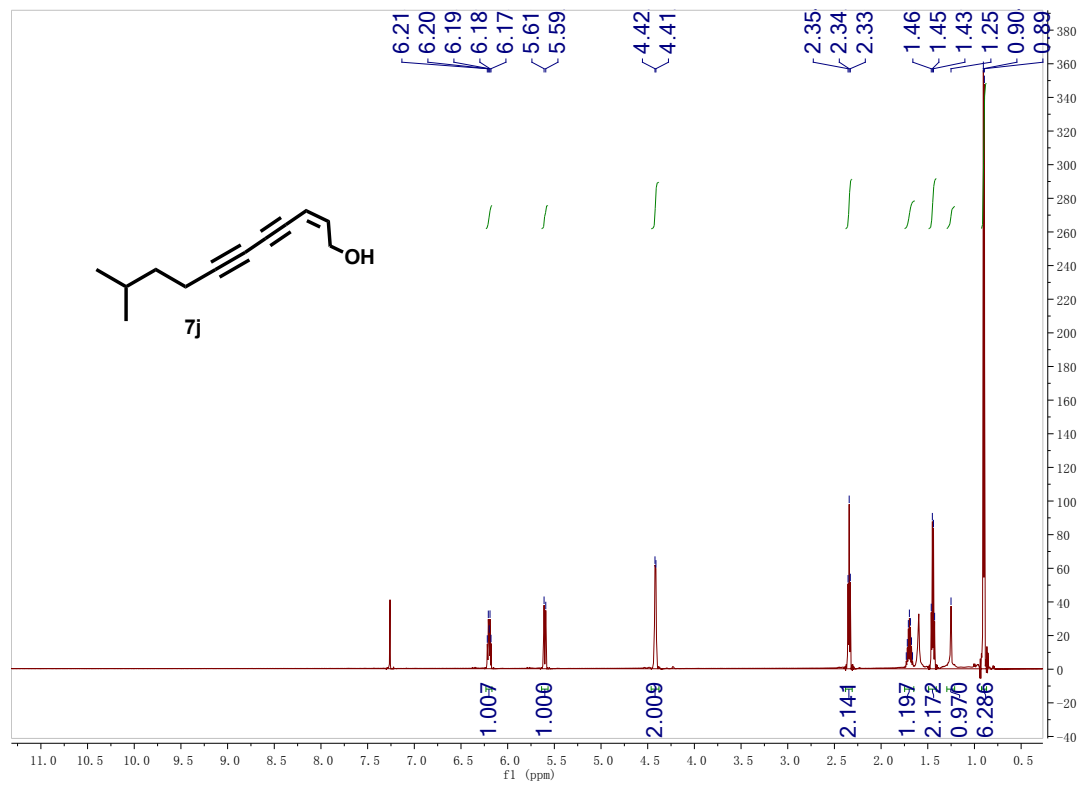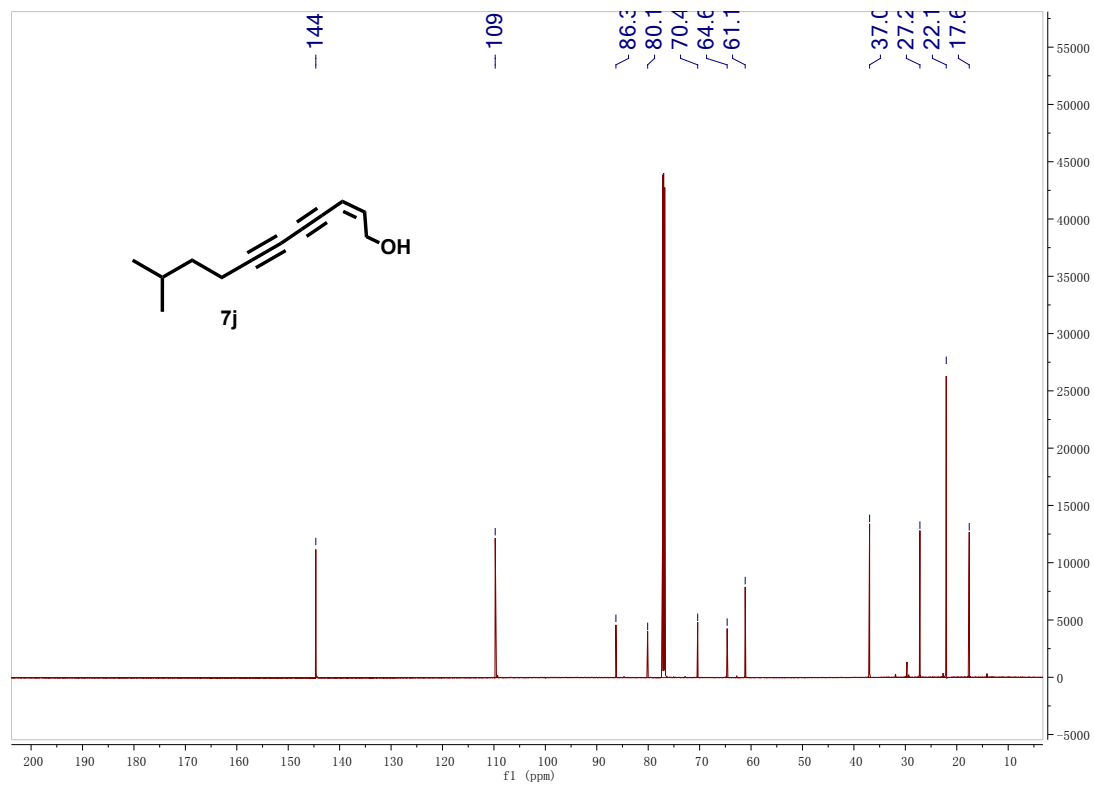

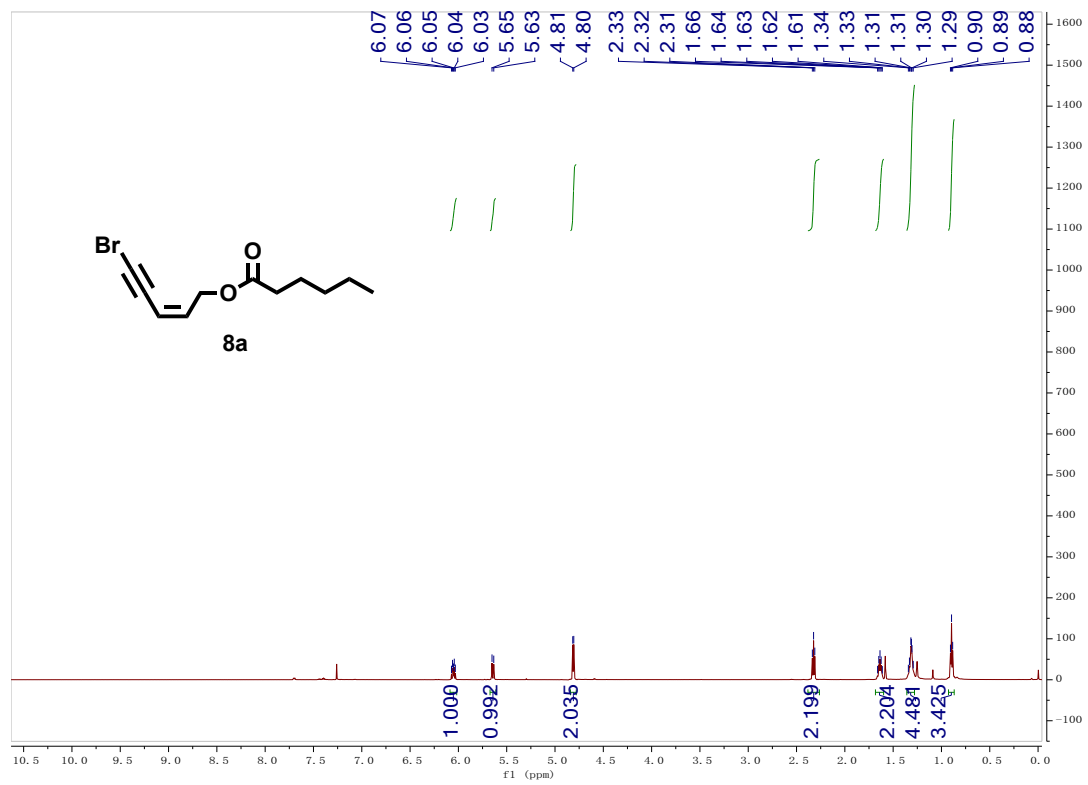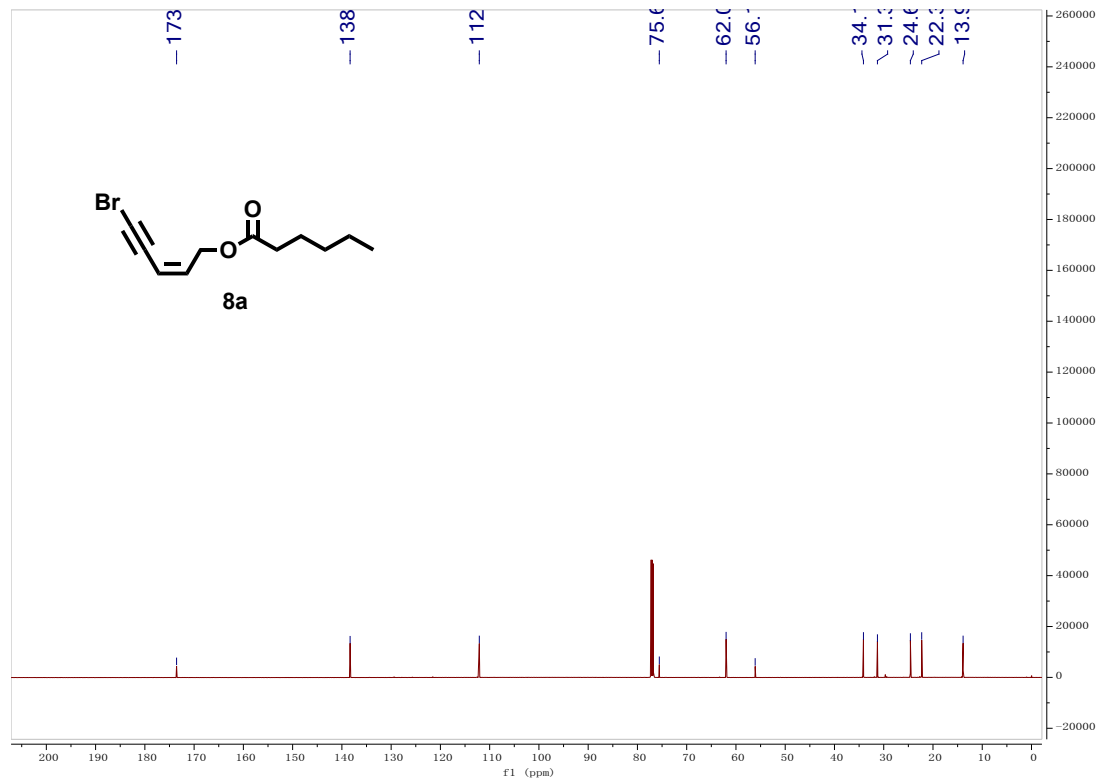

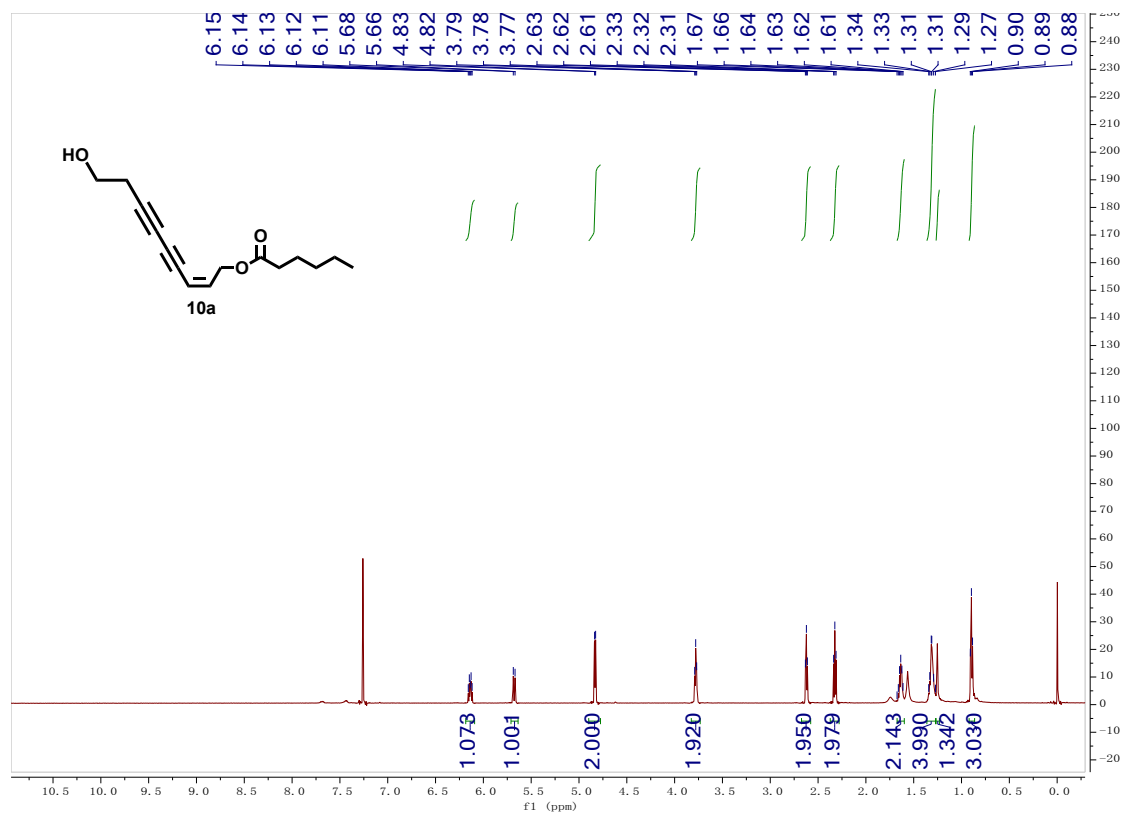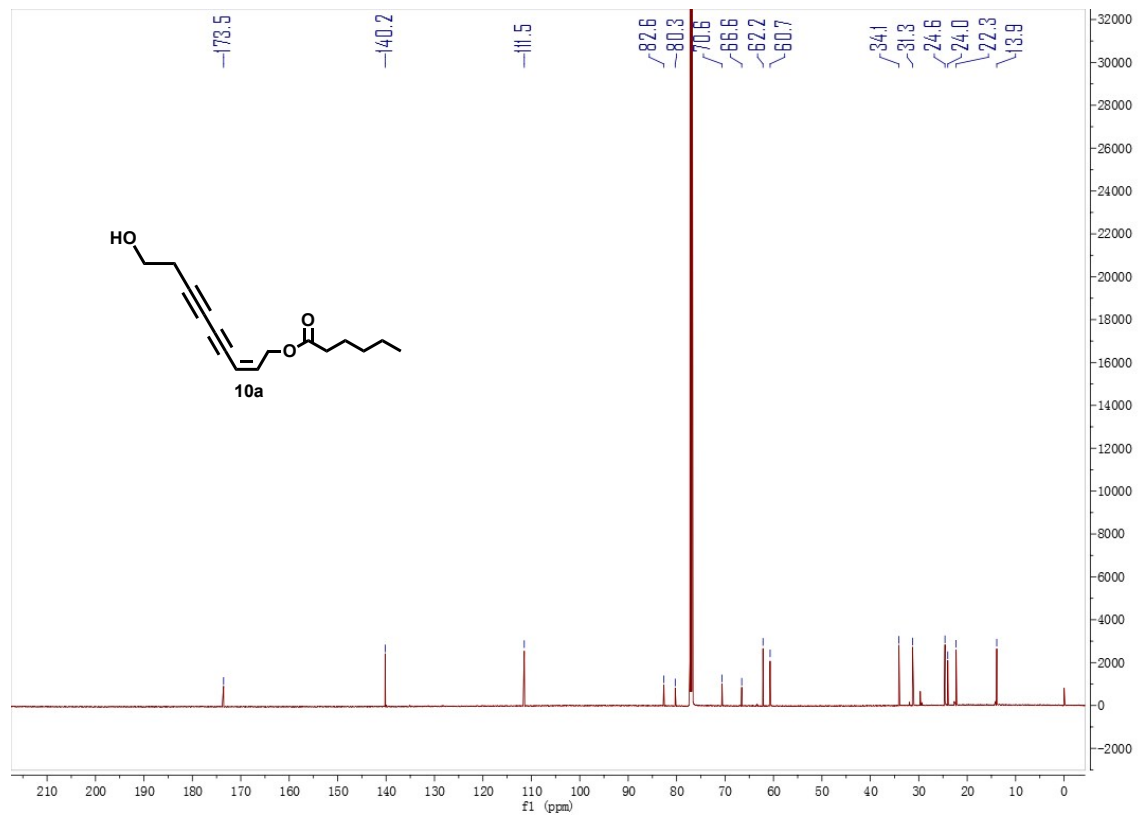

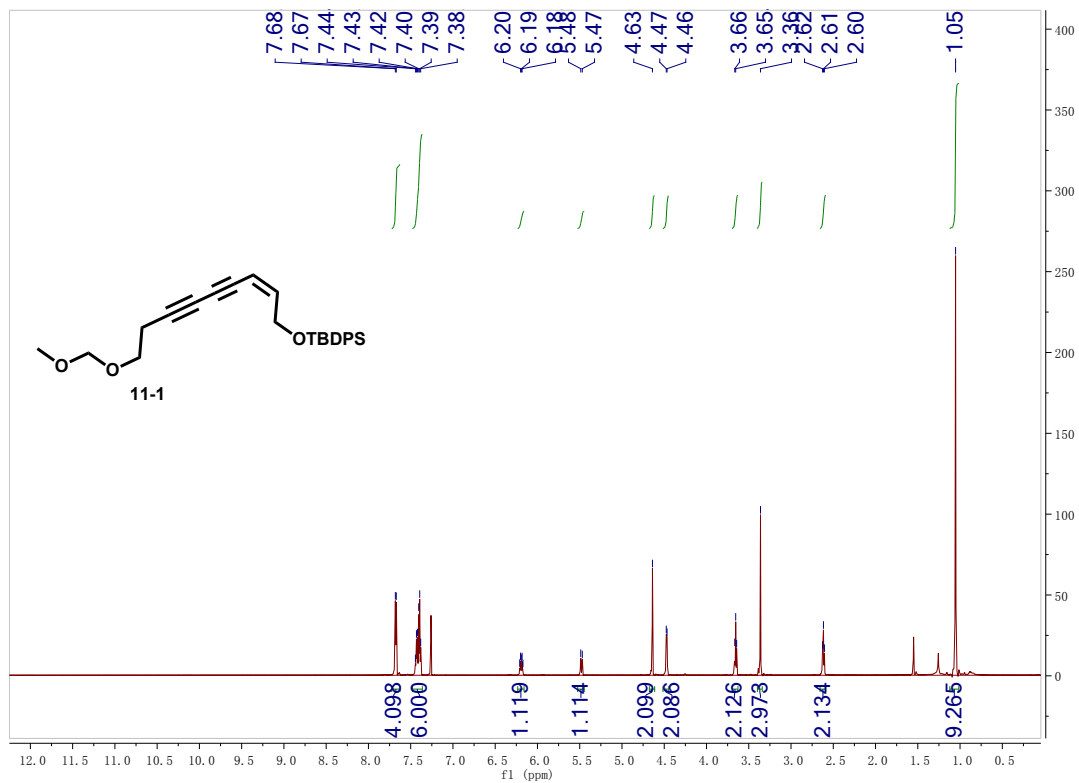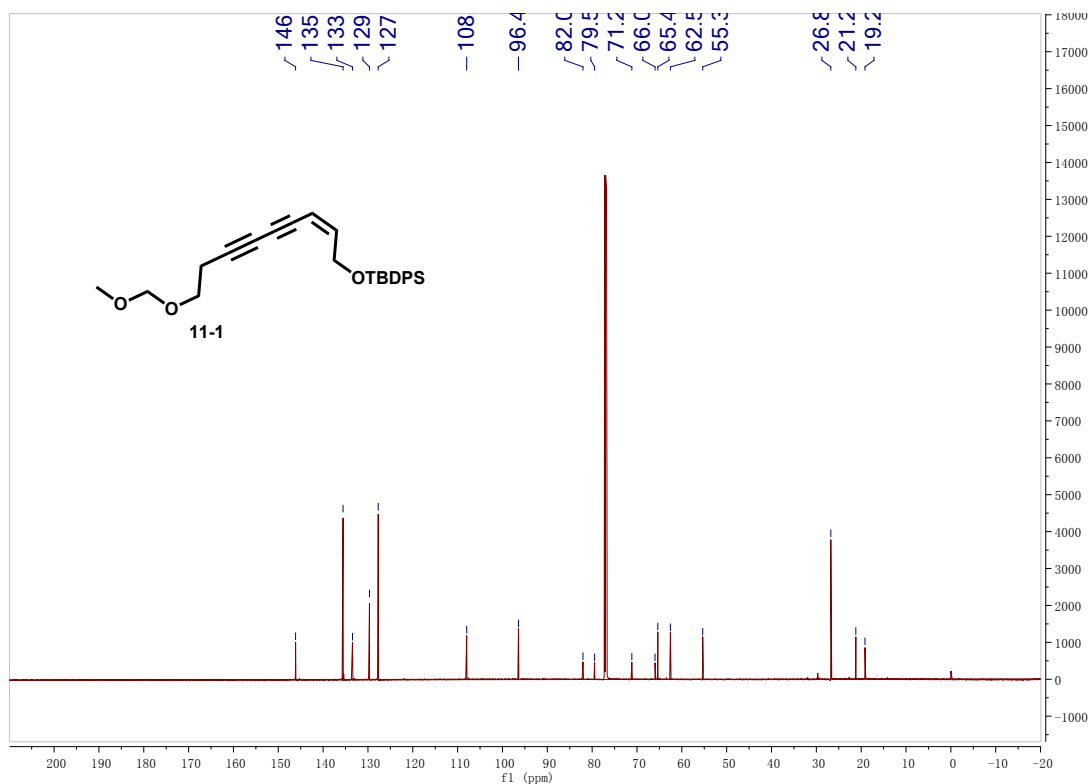

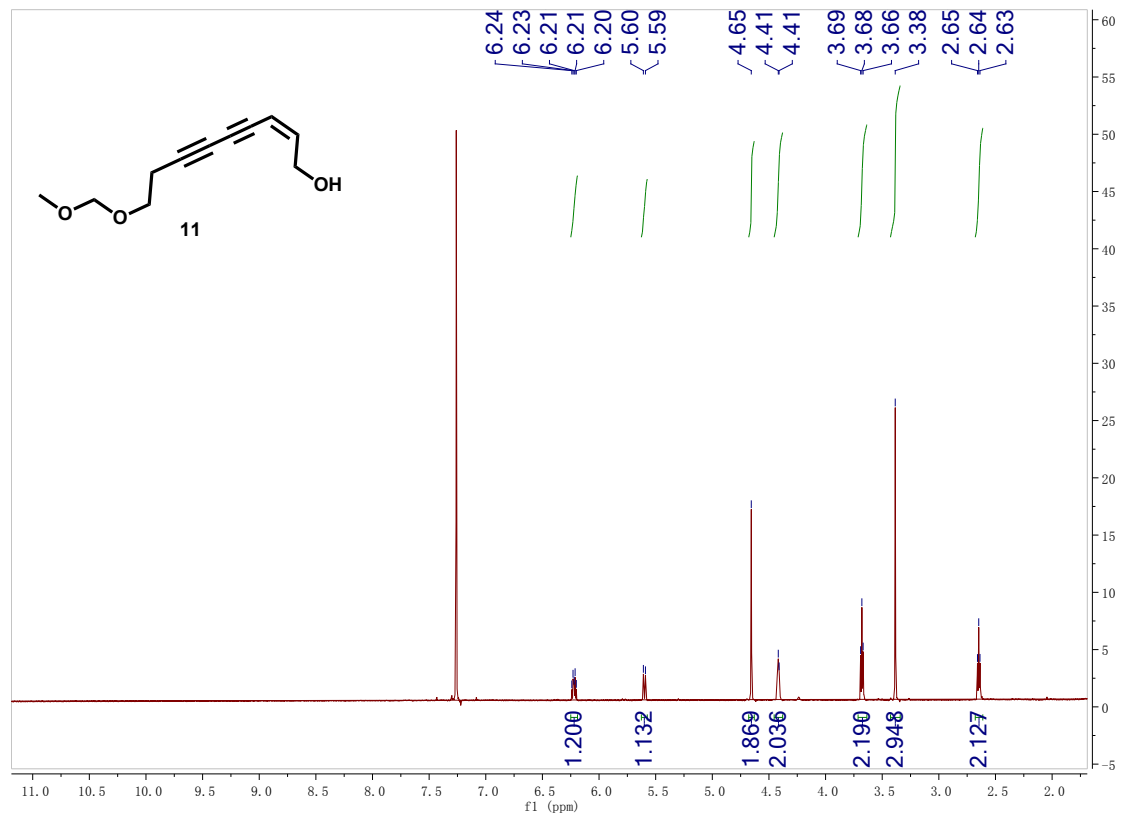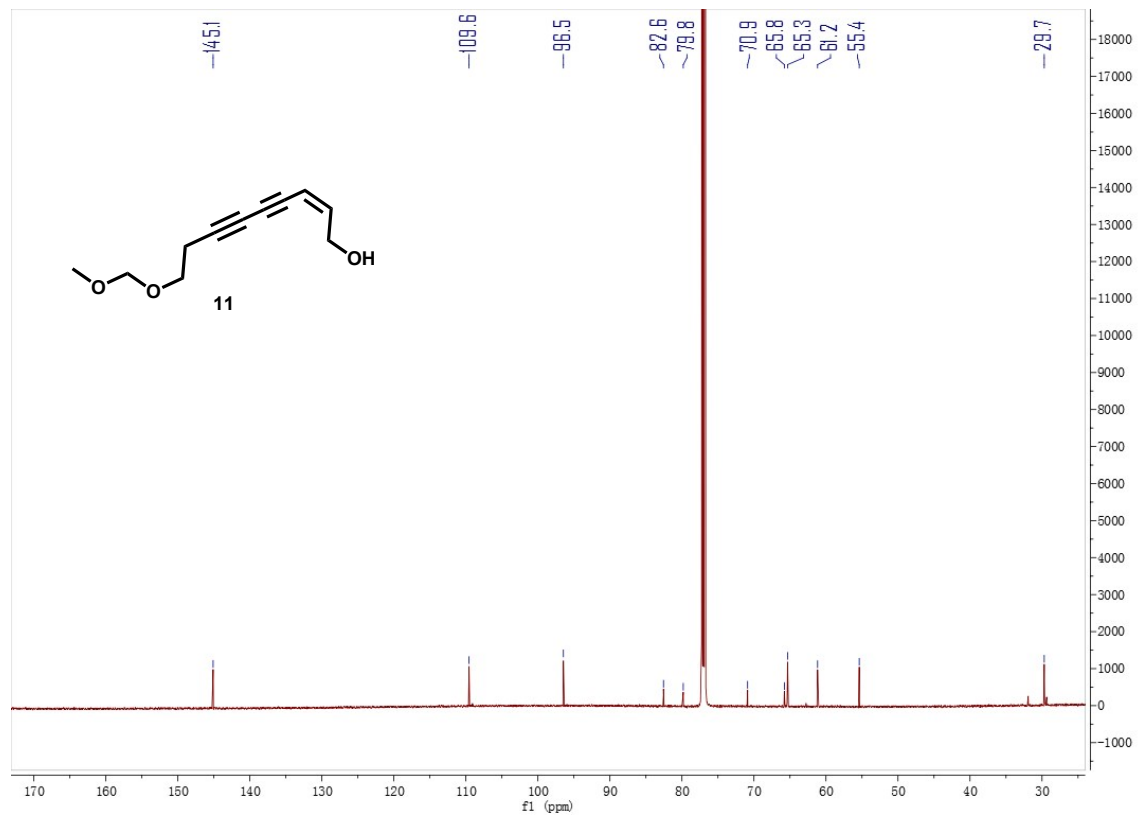

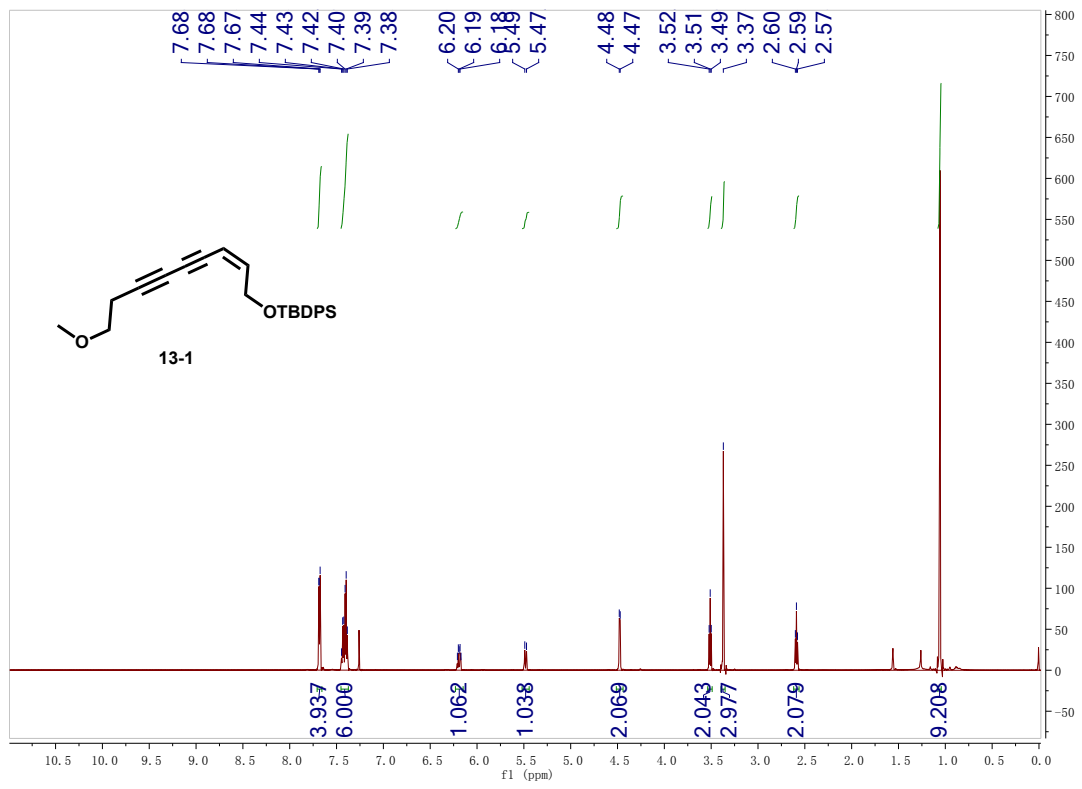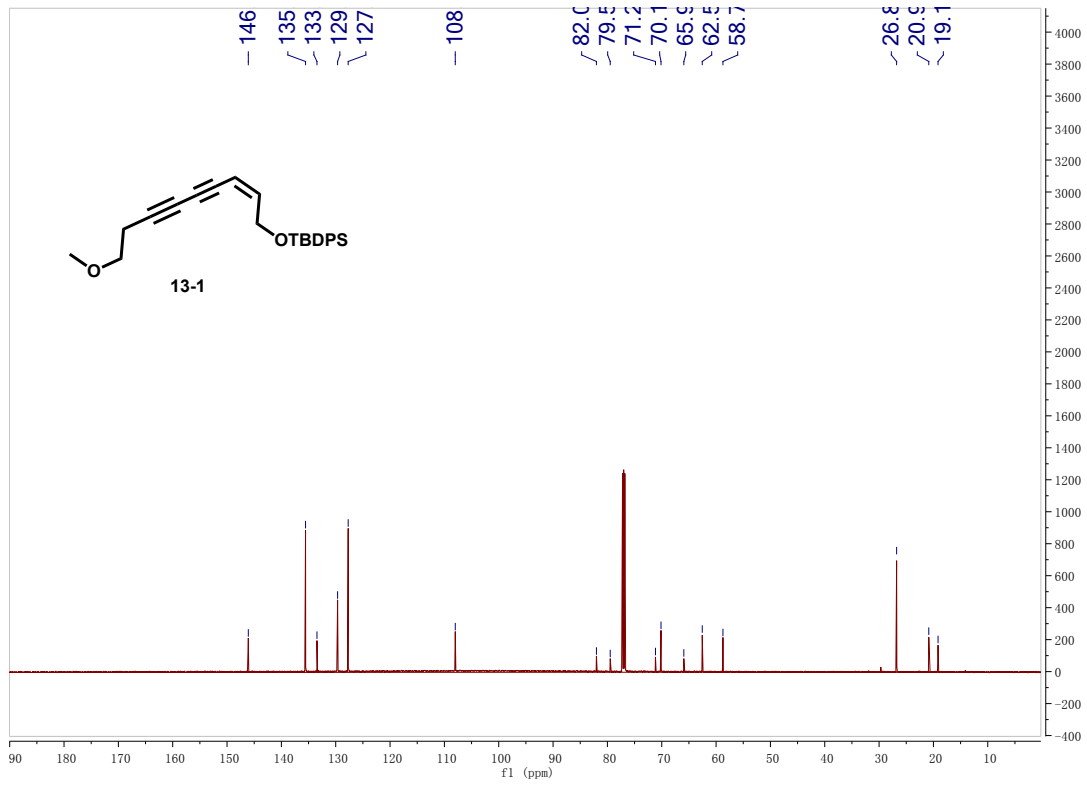



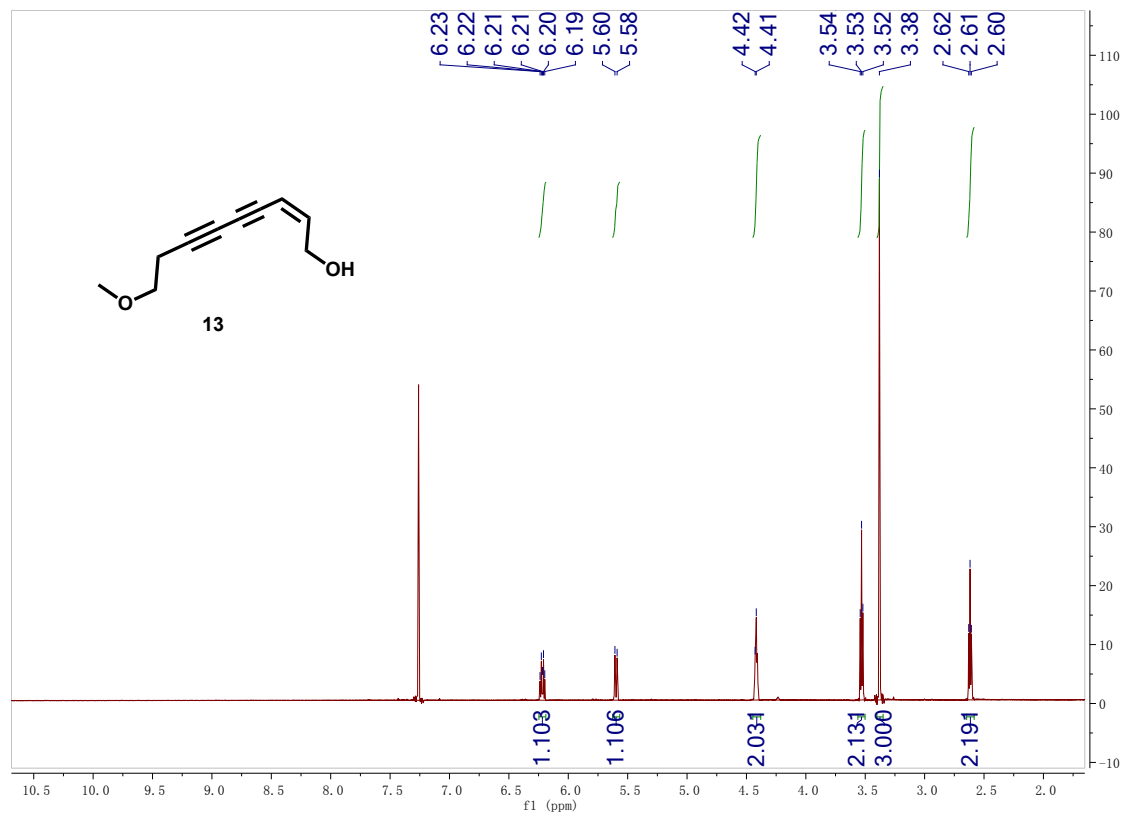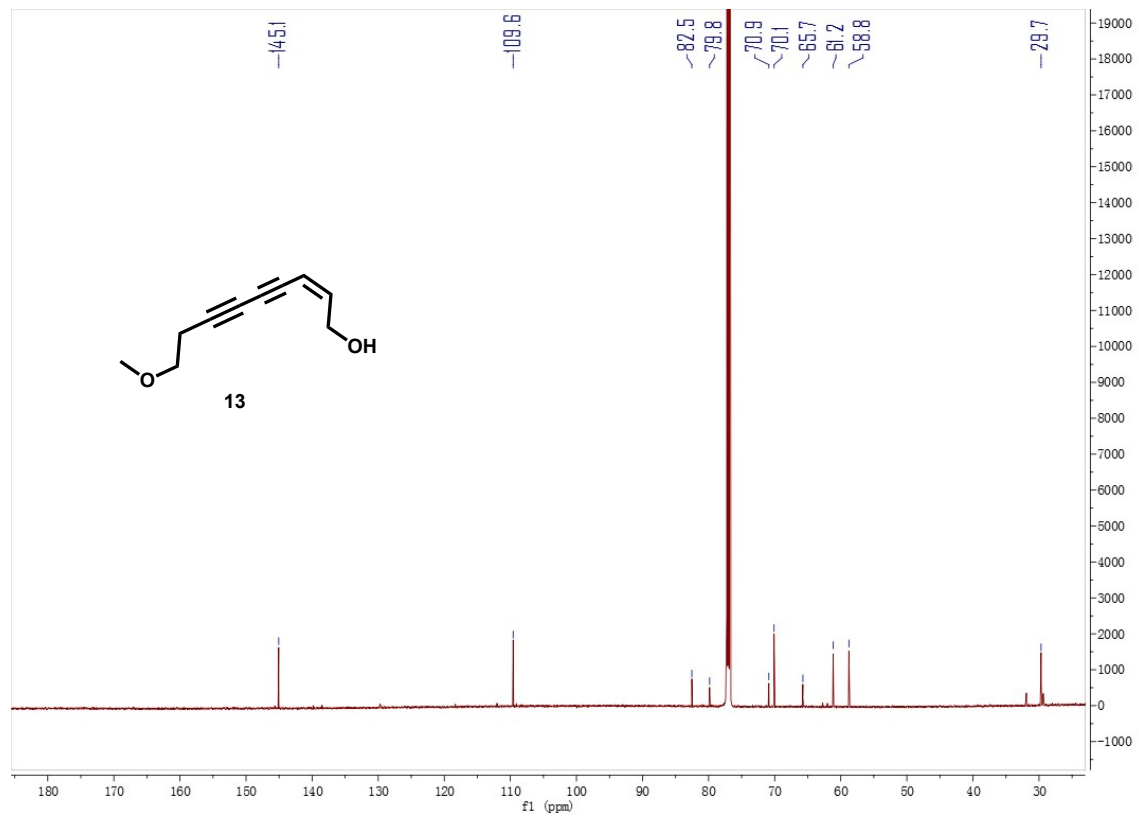

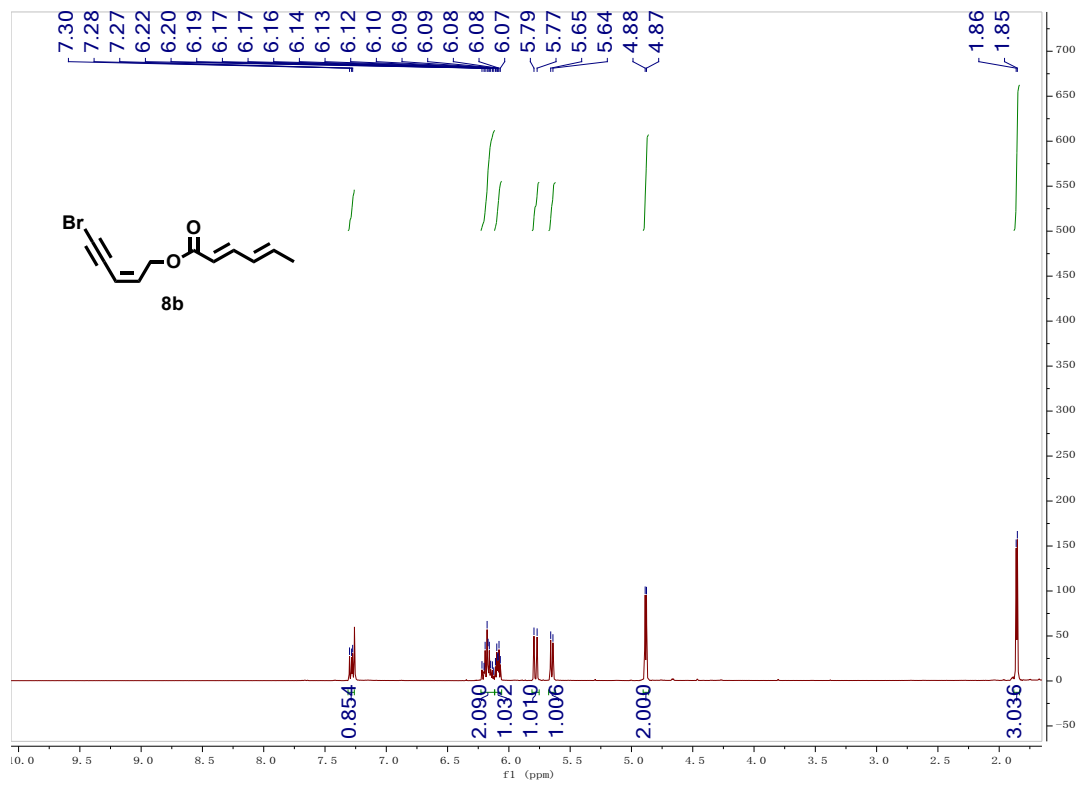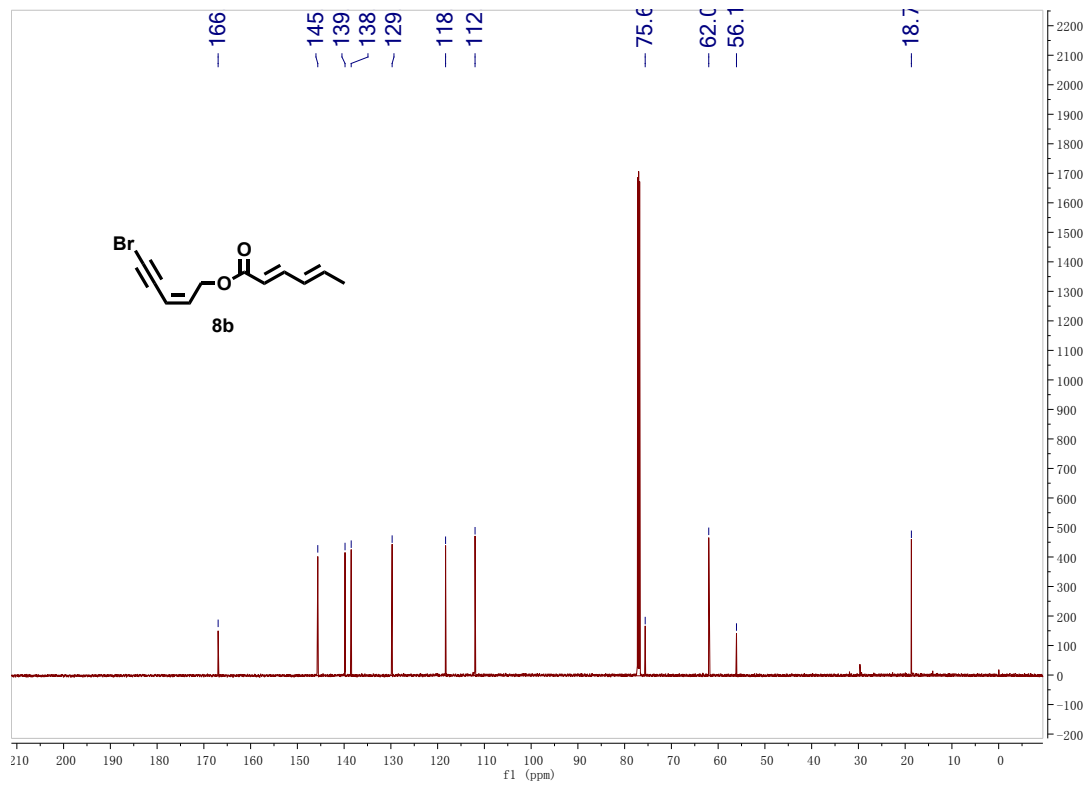

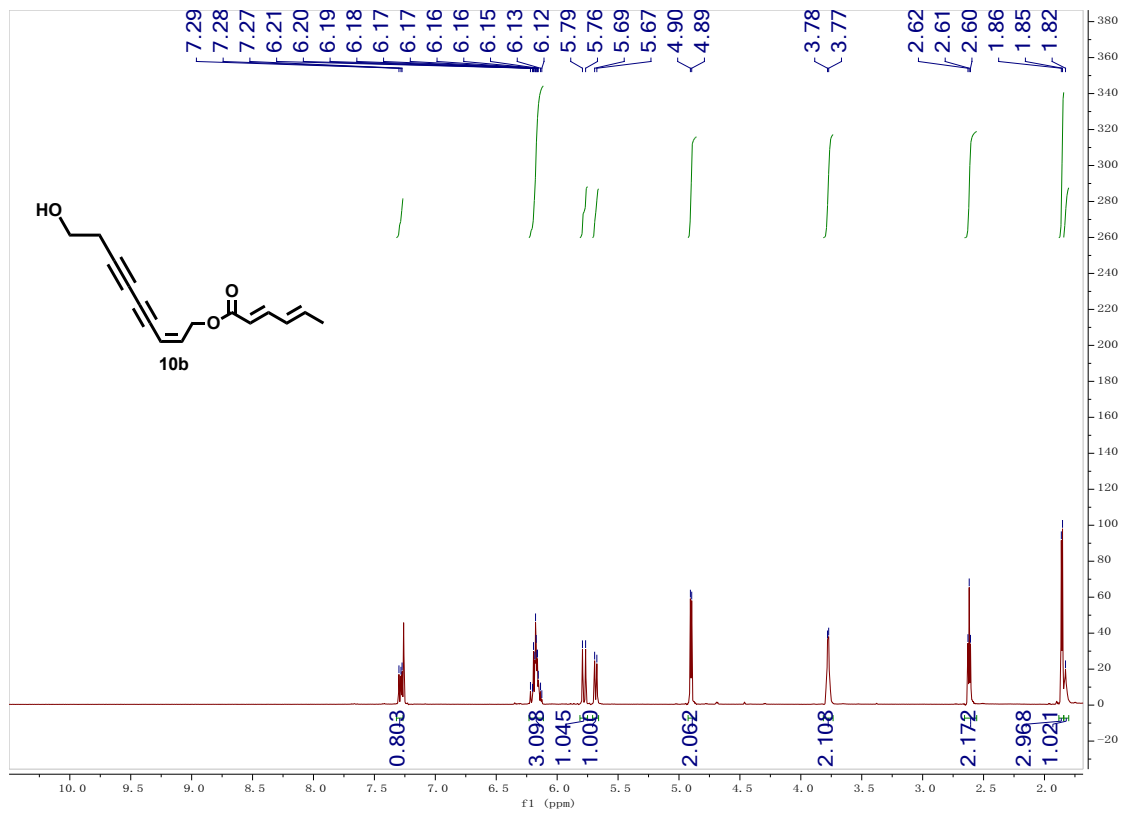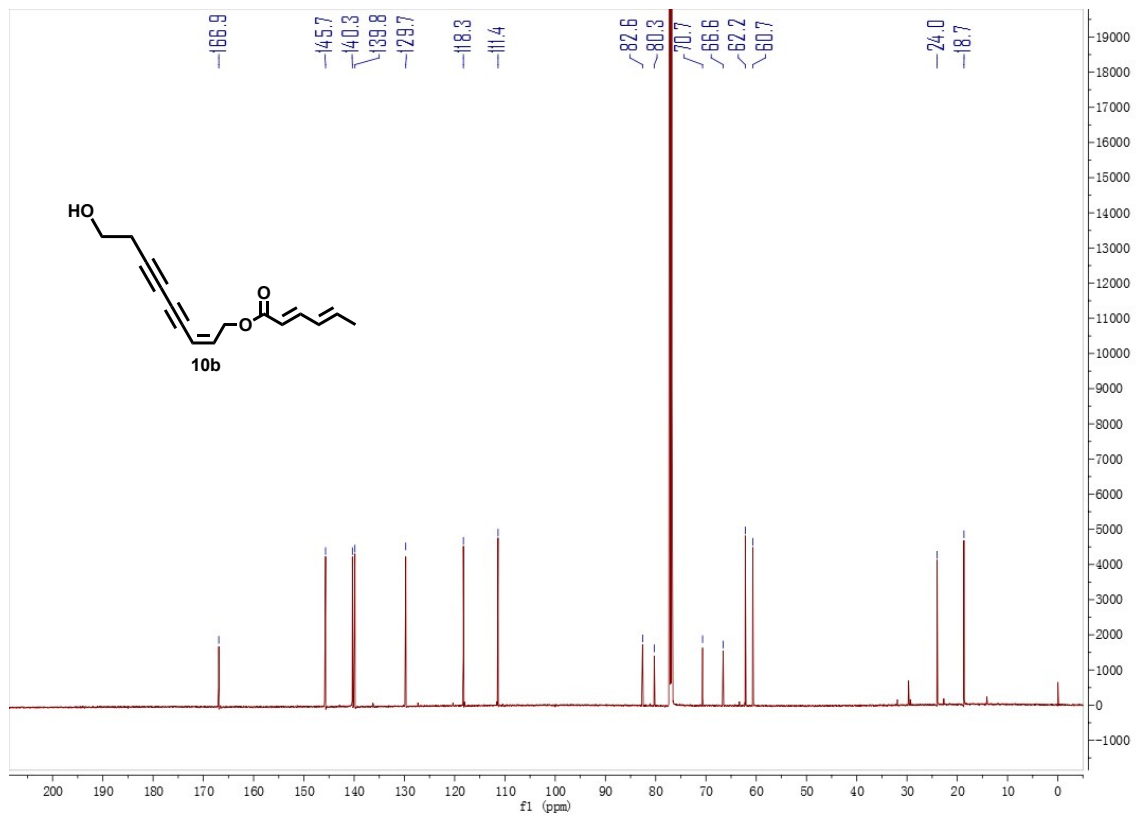

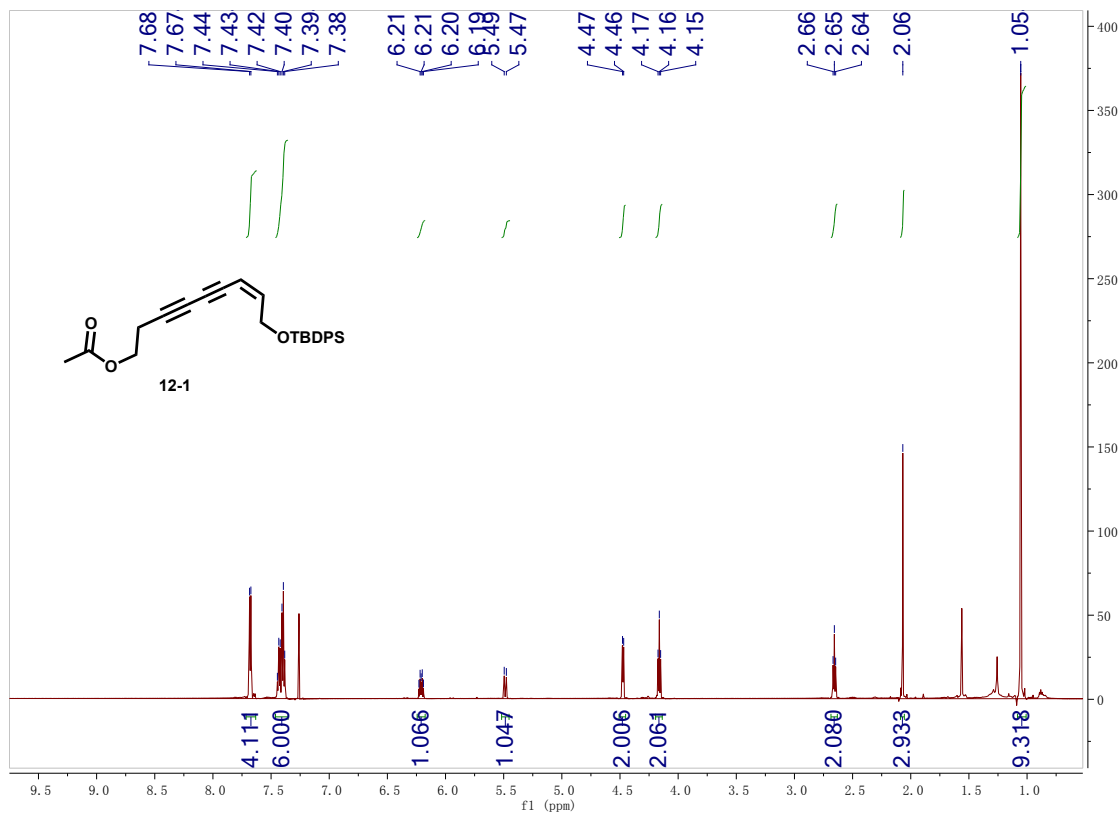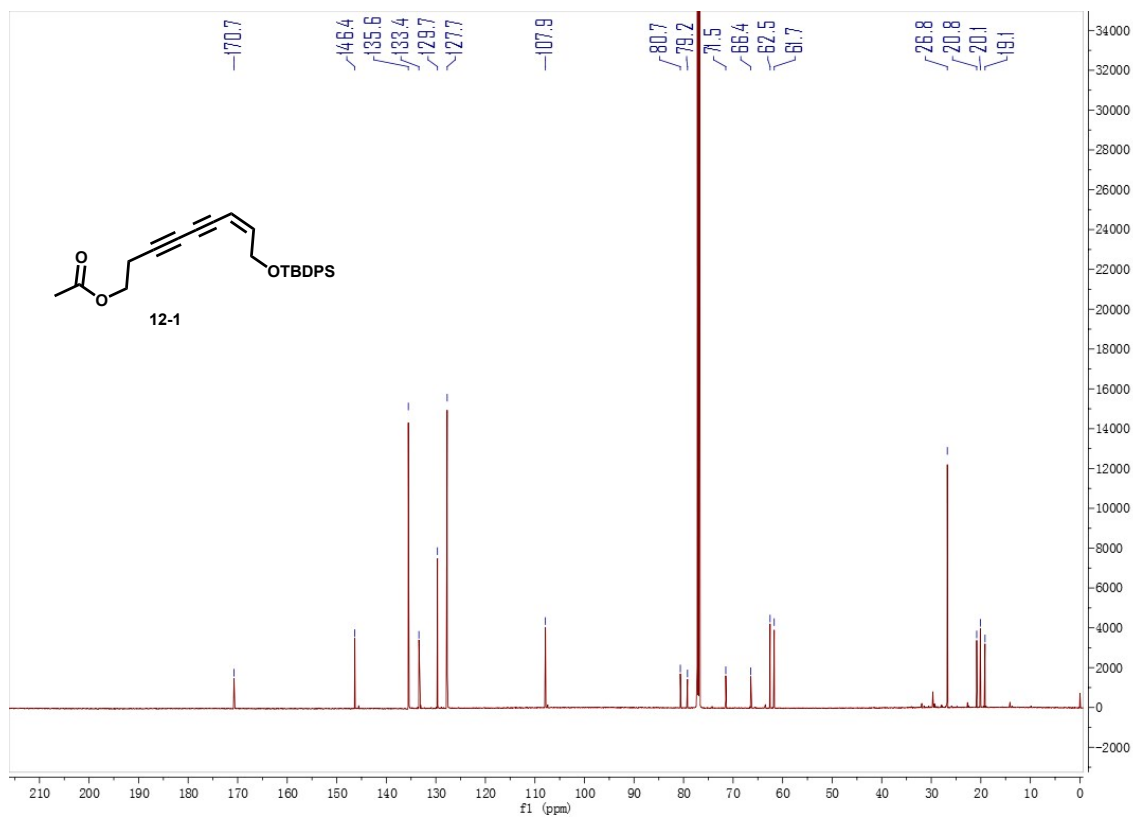

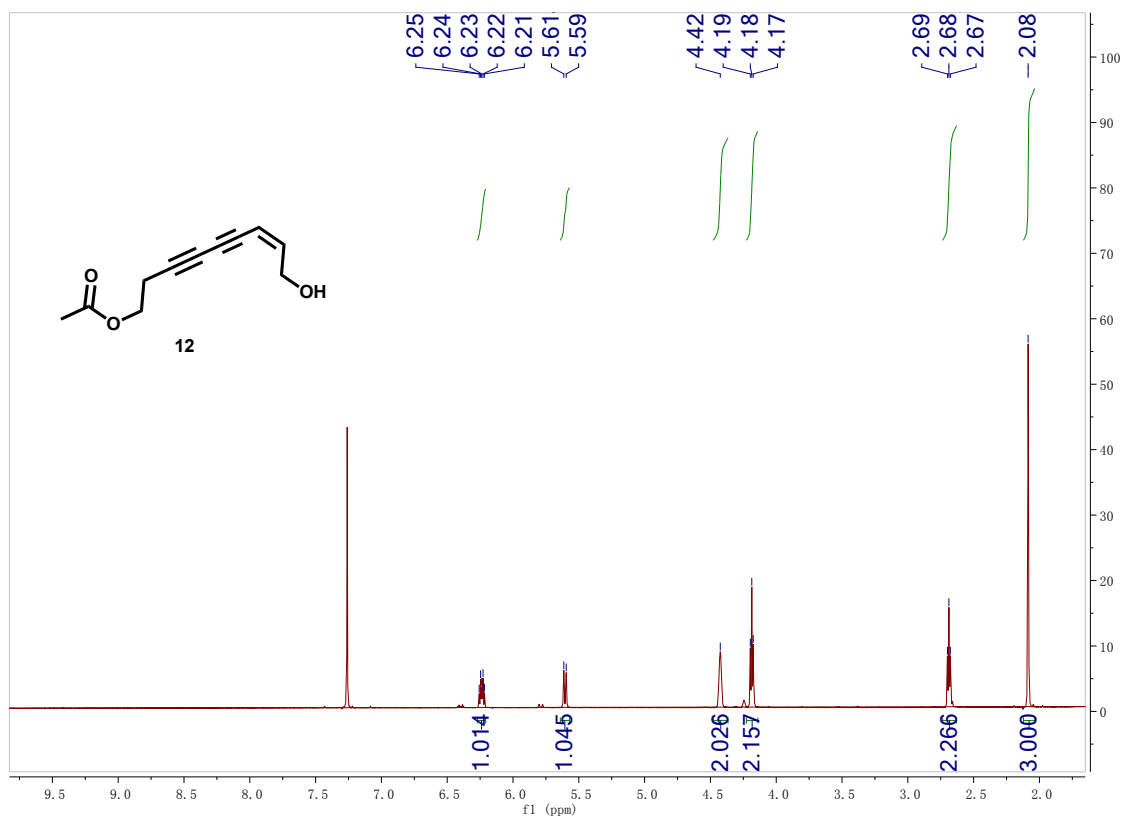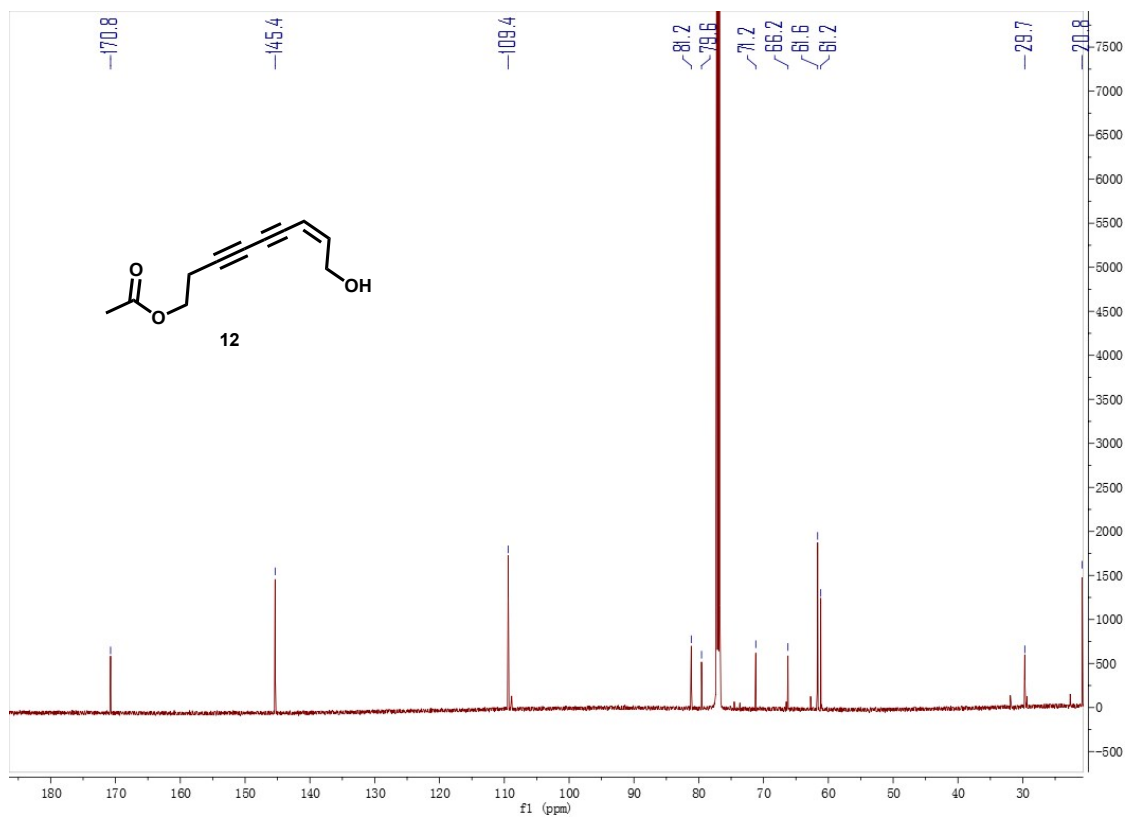

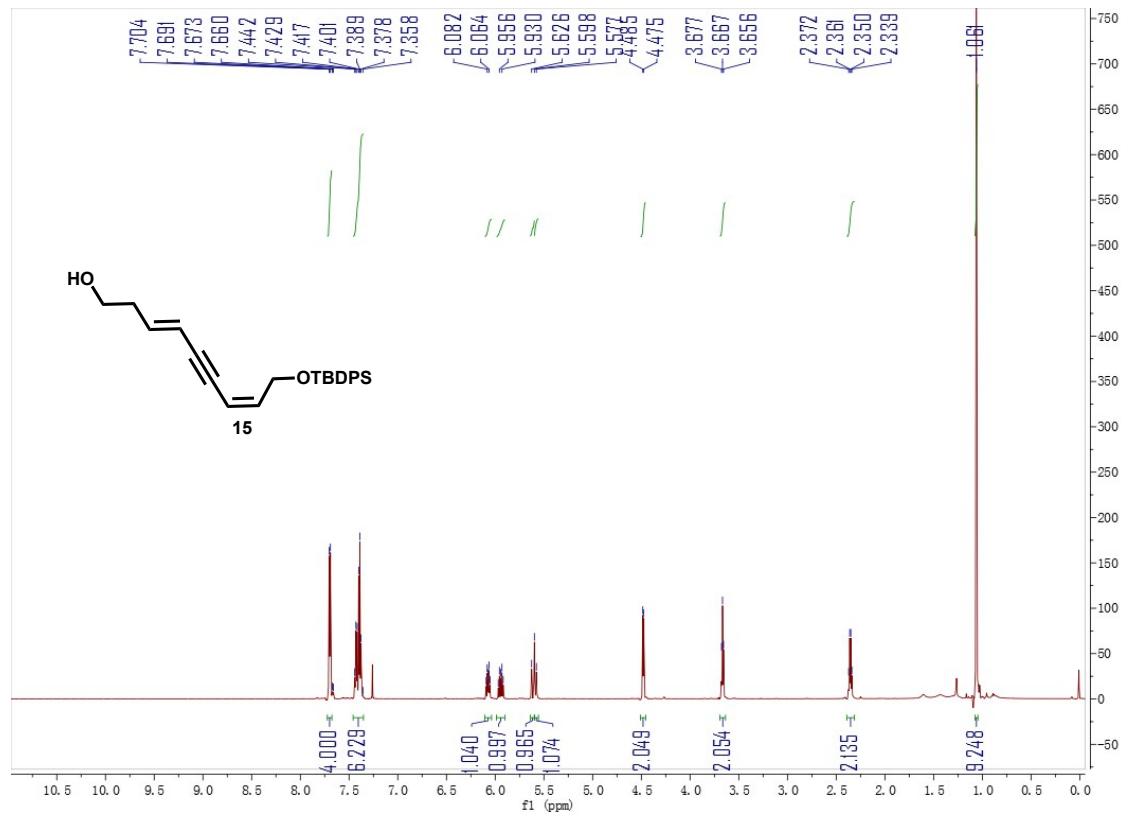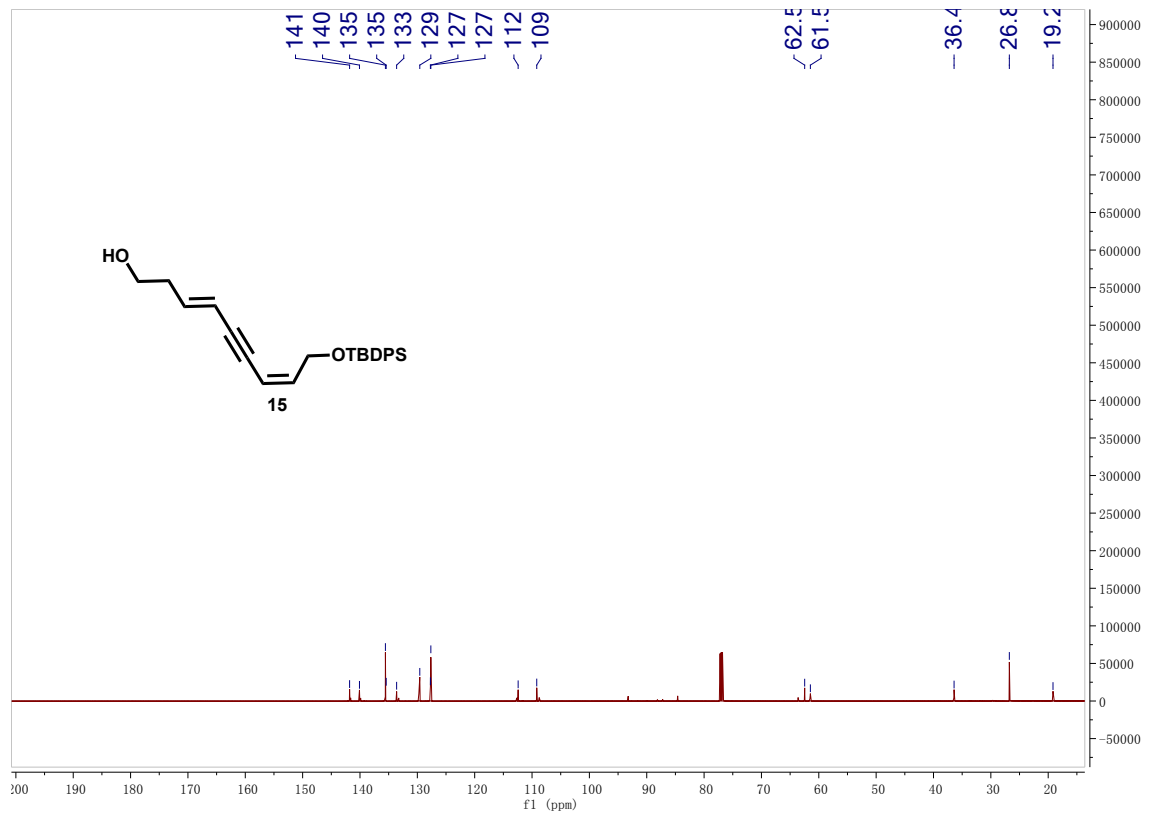

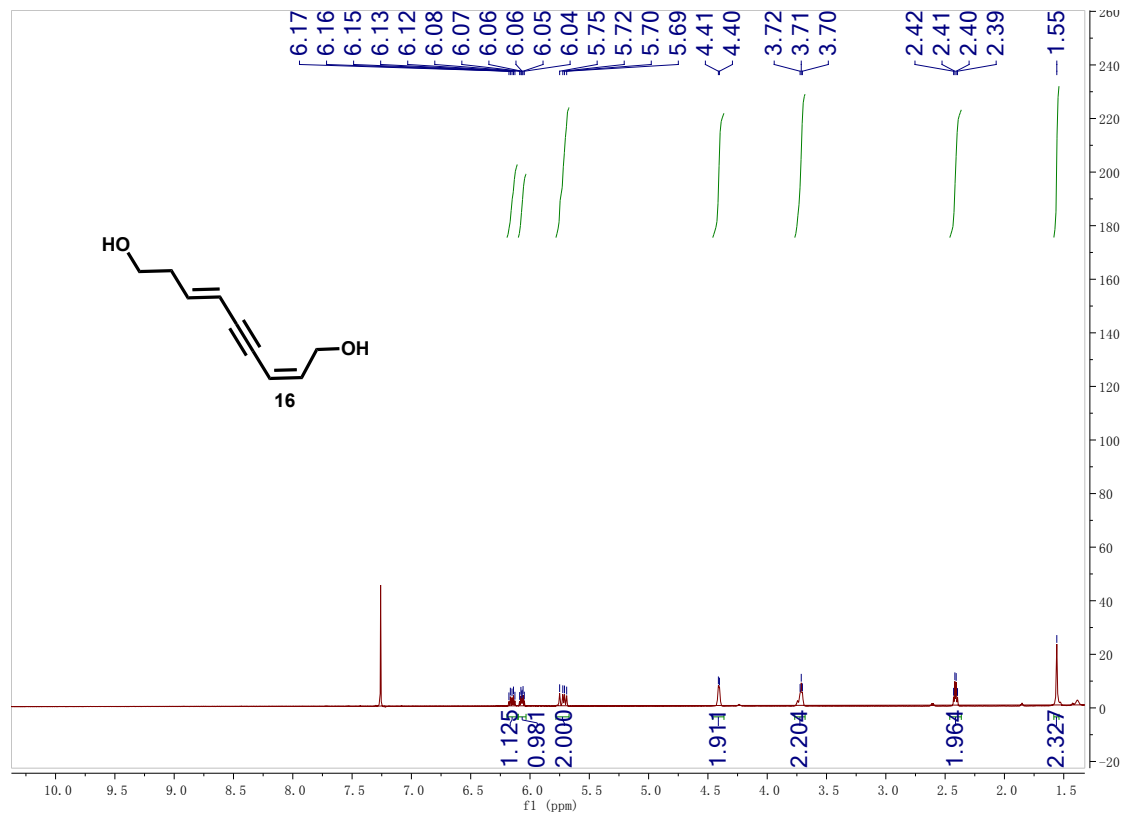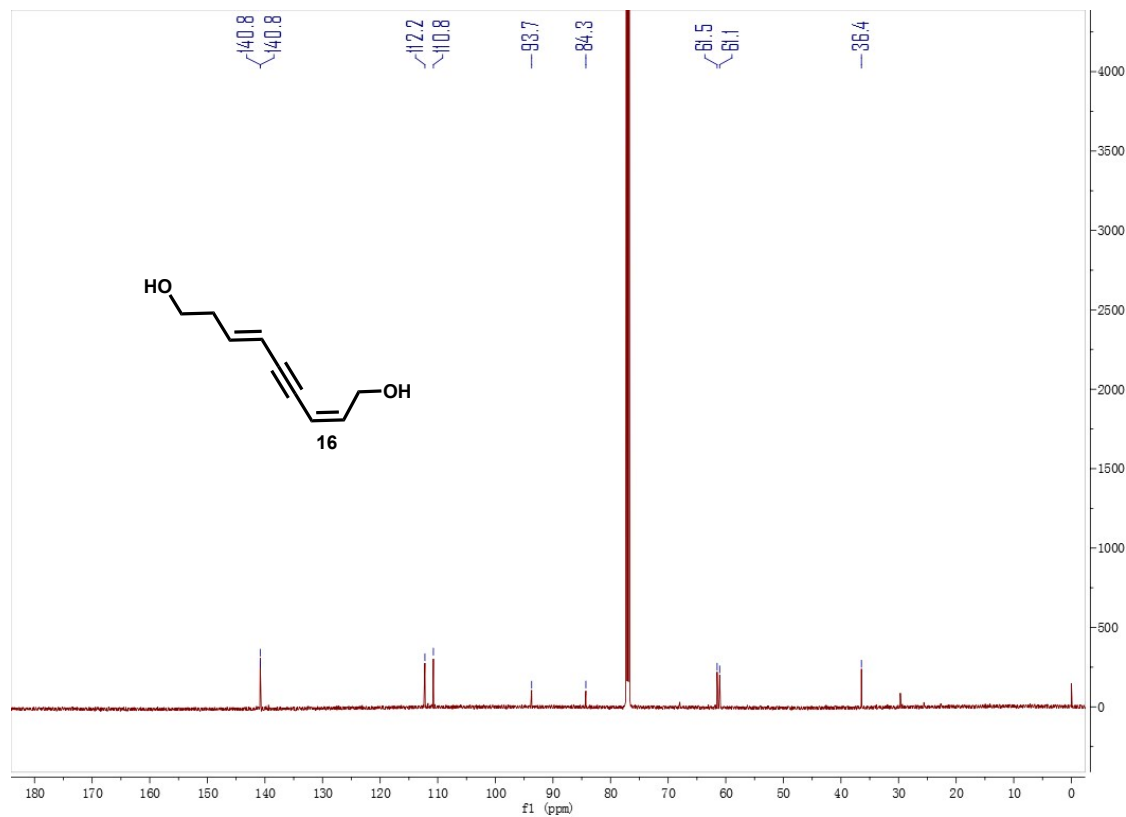

Supplement: c7ra01268c1.pdf [file c7ra01268c1.pdf]
